# Activation of XBP1s attenuates disease severity in models of proteotoxic Charcot-Marie-Tooth type 1B

Thierry Touvier,<sup>1</sup> Francesca A. Veneri,<sup>1</sup> Anke Claessens,<sup>1</sup> Cinzia Ferri,<sup>1</sup> Rosa Mastrangelo,<sup>1</sup> Noémie Sorgiati,<sup>1</sup> Francesca Bianchi,<sup>2</sup> Serena Valenzano,<sup>2,3,4</sup> Ubaldo Del Carro,<sup>2</sup> Cristina Rivellini,<sup>5</sup> Phu Duong,<sup>6</sup> Michael E. Shy,<sup>7</sup> Jeffery W. Kelly,<sup>8,9</sup> John Svaren,<sup>6</sup> R. Luke Wiseman<sup>10</sup> and Maurizio D'Antonio<sup>1</sup>

## Abstract

Mutations in myelin protein zero (MPZ) are generally associated with Charcot-Marie-Tooth type 1B (CMT1B) disease, one of the most common forms of demyelinating neuropathy. Pathogenesis of some MPZ mutants, such as S63del and R98C, involves the misfolding and retention of MPZ in the endoplasmic reticulum (ER) of myelinating Schwann cells. To cope with proteotoxic ER-stress, Schwann cells mount an unfolded protein response (UPR) characterized by activation of the PERK, ATF6 and IRE1 $\alpha$ /XBP1 pathways. Previous results showed that targeting the PERK UPR pathway mitigates neuropathy in mouse models of CMT1B; however, the contributions of other UPR pathways in disease pathogenesis remains poorly understood. Here, we probe the importance of the IRE1 $\alpha$ /XBP1 signalling during normal myelination and in CMT1B. In response to ER stress, IRE1 $\alpha$  is activated to stimulate the non-canonical splicing of *Xbp1* mRNA to generate spliced *Xbp1* (*Xbp1s*). This results in the increased expression of the adaptive transcription factor XBP1s, which regulates the expression of genes involved in diverse pathways including ER proteostasis. We generated mouse models where *Xbp1* is deleted specifically in Schwann cells, preventing XBP1s activation in these cells. We observed that *Xbp1* is dispensable for normal developmental myelination, myelin maintenance and remyelination after injury. However, *Xbp1* deletion dramatically worsens the hypomyelination and the electrophysiological and locomotor parameters observed in young and adult CMT1B neuropathic animals. RNAseq analysis suggested that XBP1s exerts its adaptive function in CMT1B mouse models in large part via the induction of ER proteostasis genes. Accordingly, the exacerbation of the neuropathy in *Xbp1* deficient mice was accompanied by upregulation of ER-stress pathways and of IRE1-mediated RIDD signaling in Schwann cells, suggesting that the activation of XBP1s via IRE1 plays a critical role in limiting mutant protein toxicity and that this toxicity cannot be

compensated by other stress responses. Schwann cell specific overexpression of XBP1s partially re-established Schwann cell proteostasis and attenuated CMT1B severity in both the S63del and R98C mouse models. In addition, the selective, pharmacologic activation of IRE1 $\alpha$ /XBP1 signaling ameliorated myelination in S63del dorsal root ganglia explants.

Collectively, these data show that XBP1 has an essential adaptive role in different models of proteotoxic CMT1B neuropathy and suggest that activation of the IRE1 $\alpha$ /XBP1 pathway may represent a therapeutic avenue in CMT1B and possibly for other neuropathies characterized by UPR activation.

Author affiliations:

1 Division of Genetics and Cell Biology, IRCCS Ospedale San Raffaele, 20132 Milan, Italy

2 Institute of Experimental Neurology, IRCCS Ospedale San Raffaele, 20132 Milan, Italy

3 Department of Biomedical and Clinical Sciences “L. Sacco”, University of Milan, 20157 Milan, Italy

4 University of Camerino, Center for Neuroscience, 62032 Camerino, Italy

5 Division of Neuroscience, IRCCS Ospedale San Raffaele, 20132 Milan, Italy

6 Department of Comparative Biosciences, School of Veterinary Medicine, University of Wisconsin-Madison, Madison, WI 53706, USA

7 Department of Neurology, Carver College of Medicine, University of Iowa, Iowa City, IA 52242 USA

8 Department of Chemistry, The Scripps Research Institute, La Jolla, CA 92037, USA

9 The Skaggs Institute for Chemical Biology, The Scripps Research Institute, La Jolla, CA 92037, USA

10 Department of Molecular and Cellular Biology, The Scripps Research Institute, La Jolla, CA 92037, USA

Correspondence to: Maurizio D’Antonio

Division of Genetics and Cell Biology

IRCCS Ospedale San Raffaele,

Via Olgettina 58

20132, Milan

Italy

dantonio.maurizio@hsr.it

**Running title:** Role of XBP1 in proteotoxic neuropathies

**Keywords:** Schwann cell, demyelinating neuropathy, unfolded protein response, Charcot-Marie-Tooth, XBP1, proteostasis

## Introduction

In the peripheral nervous system (PNS) Schwann cells synthesize the myelin sheath that surrounds axons, allowing for fast conduction of the electrical impulses and protecting the axons from insults.<sup>1</sup> Myelination requires Schwann cells to synthesize massive amounts of lipids and proteins that are then delivered to the plasma membrane through the secretory pathway.<sup>2</sup> After the completion of myelination, the maintenance of myelin homeostasis is essential to preserve axon functionality.<sup>3</sup> Myelin protein zero (MPZ/P0) is the most abundant protein of peripheral myelin, where it allows adhesion between adjacent myelin lamellae. Exact P0 folding and structure are essential for its function and for correct myelination.<sup>4</sup> Indeed, single point mutations in *MPZ* are associated with autosomal dominant neuropathies with diverse phenotypes, ranging from classic demyelinating Charcot-Marie-Tooth disease type 1B (CMT1B), to the severe Dejerine-Sottas syndrome (DSS) and congenital hypomyelination,<sup>5,6</sup> to primary axonal neuropathies also classified as CMT2J/I.<sup>7</sup> The analysis of transgenic mice with authentic *Mpz* mutations has shown that they produce variable phenotypes through diverse gain of function mechanisms.<sup>8</sup> Several mutant P0 proteins, among them S63del (CMT1B phenotype) and R98C (DSS phenotype), are retained in the endoplasmic reticulum (ER) where they induce ER stress and elicit an unfolded protein response (UPR).<sup>9-11</sup>

In mammalian cells, the UPR comprises three pathways activated downstream of the ER membrane proteins inositol requiring kinase 1 $\alpha$  (IRE1 $\alpha$ ), activating transcription factor 6 (ATF6), and pancreatic ER kinase (PERK). These three proteins are activated in response to

ER stress to initiate transcriptional and translational programs aimed at reducing the load of unfolded proteins through upregulation of chaperones, attenuation of protein synthesis and increased protein degradation.<sup>12,13</sup> The importance of the UPR in myelin diseases, including CMT, has been demonstrated in several studies.<sup>14,15</sup> We have provided genetic and pharmacological evidence that modulation of the PERK/P-eIF2 $\alpha$  pathway can alter disease severity in rodent models of both CMT1B and CMT1A, the most common form of CMT, due to *PMP22* duplication. Ablation of the transcription factor CHOP (downstream of P-eIF2 $\alpha$ ) or inactivation of its target GADD34 from *MpzS63del* mice improved the CMT1B phenotype.<sup>10,16</sup> Furthermore, Sephin1/IFB-088 a small molecule that prolongs translational attenuation by inhibiting P-eIF2 $\alpha$  dephosphorylation, ameliorated disease parameters in models of CMT1B, CMT1A and amyotrophic lateral sclerosis in mice,<sup>17,18</sup> strongly suggesting that the modulation of the UPR may represent a therapeutic option for CMT with altered proteostasis.

Among the UPR sensors, IRE1 $\alpha$  is the most conserved through evolution.<sup>12</sup> When misfolded proteins accumulate in the ER, IRE1 $\alpha$  is activated through a mechanism involving oligomerization and autophosphorylation. This activates the IRE1 $\alpha$  cytosolic endoribonuclease (RNase) activity. The IRE1 $\alpha$  RNase induces the unconventional splicing of X-box binding protein-1 (XBP1) mRNA leading to the production of spliced Xbp1 (XBP1s), a transcription factor that upregulates genes involved in ER biogenesis, protein folding and ER-associated degradation (ERAD).<sup>19,20</sup> In conditions of ER-stress, IRE1 $\alpha$  also leads to the degradation of a specific subset of mRNAs, in a process known as mRNA regulated IRE1-dependent decay (RIDD), which is thought to preserve ER homeostasis by reducing the load of cargo proteins entering the ER.<sup>21</sup> XBP1 has a crucial role in mammalian physiology and diseases. Whole body *Xbp1* knock-out mice present hypoplastic foetal livers and die during early development due to anemia.<sup>22</sup> Further, tissue-specific *Xbp1* conditional deletion causes severe abnormalities in plasma cells and pancreatic  $\beta$ -cells.<sup>23,24</sup> Activation of XBP1s signalling was shown to be protective in several disease models, including Alzheimer's disease<sup>25</sup> and injury-induced retinal ganglion cell death.<sup>26</sup> In contrast, XBP1s signalling was shown to be detrimental in models of amyotrophic lateral sclerosis,<sup>27</sup> whereas contrasting results were obtained in Huntington disease models.<sup>28,29</sup> The role of XBP1 in PNS development and neuropathy has however never been explored. To investigate this, we have generated and fully characterized from a clinical, neurophysiological, morphological and molecular perspective two different models of proteotoxic CMT1B in which *Xbp1* or *Xbp1s* were deleted or overexpressed, respectively, in a Schwann cells. Further, taking advantage of myelinating

dorsal root ganglia (DRG) organotypic cultures, we have also explored how the pharmacologic modulation of IRE1 $\alpha$ /XBP1 signalling affect myelination in CMT1B.

## Materials and methods

### Animal models

All experiments involving animals were performed in accord with experimental protocols approved by the San Raffaele Scientific Institute Animal Care and Use Committee. *P0Cre*, *MpzS63del* (*S63del* herein), *MpzR98C/+* (*R98C* herein), *Xbp1<sup>fl/fl</sup>* and *ROSA26-XBP1s* mice with relative genotyping procedures have been previously described.<sup>8,9,30-32</sup> We initially crossed *S63del* and *P0Cre* mice with *Xbp1<sup>fl/fl</sup>* mice to obtain *S63del/Xbp1<sup>fl/+</sup>* and *P0Cre/Xbp1<sup>fl/+</sup>* mice that were then intercrossed to obtain the four experimental groups WT, *P0Cre/Xbp1<sup>fl/fl</sup>* (for the Schwann cell specific ablation of *Xbp1*, *Xbp1<sup>SC-KO</sup>* mice herein), *S63del* and *S63del/P0Cre/Xbp1<sup>fl/fl</sup>* (*S63del/Xbp1<sup>SC-KO</sup>* herein). The same scheme was used to generate *R98C/Xbp1<sup>SC-KO</sup>* mice and the relative controls. Similarly, we crossed *P0Cre* and *ROSA26-XBP1s* mice to obtain *XBP1<sup>SC-OE</sup>* (Schwann cell specific overexpression of XBP1s) mice that were then crossed with either *S63del* or *R98C* mice to obtain *S63del/XBP1<sup>SC-OE</sup>* and *R98C/XBP1<sup>SC-OE</sup>* mice and the relative controls. *S63del* and *R98C* mice were maintained on the FVB/N background, whereas *P0Cre*, *Xbp1<sup>fl/fl</sup>* and *ROSA26-XBP1s* were on C57BL/6 genetic background. The analysis of all experimental genotypes was performed in F1 hybrid background FVB // C57BL6.

### Sciatic nerve crush

Adult WT and *Xbp1<sup>SC-KO</sup>* mice were anesthetized with tribromoethanol, 0.4 mg/gr of body weight and crush injury performed as described.<sup>33</sup> Briefly, after skin incision, the sciatic nerve was exposed and crushed distal to the sciatic notch for 20 seconds with fine forceps previously cooled in dry ice. To identify the site of injury, forceps were previously dropped into vital carbon. The nerve was replaced under the muscle and the incision sutured. All the experiments have been performed on the distal portion of the crushed nerve.

## **Behavioural analysis in Rotarod**

Motor ability was assessed using the accelerating Rotarod (Ugo Basile, Comerio, Italy) as previously described.<sup>16</sup> Briefly, adult transgenic and control littermates were tested in two sessions of three trials each per day (6h rest between the two daily sessions) for 3 consecutive days. During the test, the rod accelerated from 4 to 40 rotations per minute, and the time that the animal remained on the rod (maximum 900s) was measured.

## **Neurophysiological analysis**

The electrophysiological evaluation was performed with a specific EMG system (NeuroMep Micro, Neurosoft, Russia), as previously described.<sup>10</sup> Mice were anesthetized with tribromoethanol, 0.02ml/g of body weight, and placed under a heating lamp to maintain constant body temperature. Sciatic nerve conduction velocity (NCV) was obtained by stimulating the nerve with steel monopolar needle electrodes. A pair of stimulating electrodes was inserted subcutaneously near the nerve at the ankle. A second pair of electrodes was placed at the sciatic notch to obtain two distinct sites of stimulation, proximal and distal along the nerve. Compound motor action potential (CMAP) was recorded with a pair of needle electrodes; the active electrode was inserted in muscles in the middle of the paw, whereas the reference was placed in the skin between the first and second digit. Sciatic nerve F-wave latency measurement was obtained by stimulating the nerve at the ankle and recording the responses in the paw muscle, with the same electrodes employed for the NCV study.

## **Morphological and morphometric analysis**

Transgenic mice were sacrificed at the indicated time points and sciatic nerves were dissected. Semi-thin section and electron microscope analyses of sciatic nerves, were performed as described<sup>34</sup>. The number of amyelinated or demyelinated axons were counted blind to genotype from post-natal day 30 (P30) or 6-month-old sciatic nerve semi-thin sections (0.5-1  $\mu\text{m}$  thick) stained with toluidine blue, in images taken with a 100x objective. We analyzed 1000–1800 fibers from a total of 10 - 20 fields per nerve (5 nerves). Ultrathin sections (90 nm thick) from P30 and 4 to 6-months transgenic and control sciatic nerves were cut using an ultracut ultramicrotome, stained with uranyl acetate and lead citrate and examined by electron microscopy (EM) (Leo 912 omega). G-ratio analysis (axonal diameter/fiber diameter) and the size distribution of myelinated fibers (based on axons diameter) were measured on digitalized non-overlapping electron micrograph images. 20–25 microscopic fields, randomly chosen, from nerves of 3–5 animals per genotype were analyzed.

## **Dorsal root ganglia explant cultures**

Dorsal-root-ganglia (DRG) were dissected from embryos at embryonic day 13.5 (E13.5) and plated singularly on collagen-coated coverslips as previously described.<sup>16</sup> Myelination was induced with 50  $\mu\text{g}/\text{ml}$  ascorbic acid (Sigma Aldrich). Treatment with IRE1 $\alpha$ /XBP1 activating compounds (IXA) or with the IRE $\alpha$  RNase inhibitor 4 $\mu\text{8c}$  at the indicated concentration was applied for 2-weeks in parallel to the induction of myelination. Samples were then fixed and rat anti-MBP (1/5), and rabbit anti-NF-H (1/1000, EMD Millipore) primary antibodies were added o/n at 4°C. The following day, DRGs were washed and FITC- or TRITC-conjugated secondary antibodies (1:200, Cappel) were added for 1h at room temperature. Specimen were incubated with DAPI (1:1000, SIGMA) and mounted with VectaShield (Vector Laboratories). 8-10 images were taken from each DRG using a fluorescence microscope (Leica DM5000) with a 20x objective, and the number of MBP+ internodes in each image was counted.

## **Protein extraction and Western blot**

Sciatic nerves were dissected from mice at the indicated age and frozen in liquid nitrogen. Frozen nerves were pulverized on dry ice and proteins were extracted in denaturing lysis buffer

(Tris-HCl 50 mM pH 7,5, NaCl 150 mM, EDTA 10 mM, 2% SDS) containing protease inhibitor cocktail (PIC 100X, Roche) and phosphatase inhibitors (Roche). Total protein concentration was determined by BCA assay (Pierce) following manufacturer's instructions. Equal amounts of proteins were separated by SDS-PAGE (Biorad) and gels were transferred onto nitrocellulose membrane (GE Healthcare). Membranes were blocked with 5% milk (milk powder/ 1X PBS-Tween 0,1%) or 5% BSA (BSA powder/ 1X PBS-Tween 0,1%) and incubated with primary antibodies diluted in 1% milk or 1% BSA/ 1X PBS-Tween 0,1% at 4°C overnight. HRP-conjugated antibodies were diluted in 1% milk or 1% BSA/ 1X PBS-Tween 0,1% and incubated 1h at room temperature. Signals were detected by ECL method. Densitometric analysis was performed with NIH-Image-J software. The following primary antibodies were used: mouse anti  $\beta$ -tubulin (T4026, Sigma), mouse anti-MBP (MAB 382, Chemicon), rabbit anti-PMP22 (AB2011052 Abcam), rabbit anti-P-eIF2 $\alpha$  (Ser51)(D9G8) XP and anti-eIf2 $\alpha$  (D7D3) XP (Cell Signaling), rabbit anti-BiP (NB300520, Novus Biologicals), rat anti-GRP94 (ab2791, Abcam), rabbit anti-IRE1a (3294, Cell Signaling), rabbit anti P-JNK and JNK (4668 and 9252, Cell Signaling), chicken anti-P0 (PZO, Aves). Peroxidase-conjugated secondary antibodies (anti-rabbit HRP, DAKO, P0448; anti-chicken IgG-peroxidase, Sigma; anti-mouse IgG peroxidase, A3682, Sigma) were visualized using Amersham ECL or ECL Prime 225 reagent (GE Healthcare) for high-sensitivity chemiluminescent protein detection with Uvitec gel analysis systems or using enhanced chemiluminescence (ECL) reagents (Bio-Rad) with autoradiography film (Kodak Scientific Imaging Film, Blue XB). Total proteins were visualized via staining with Coomassie Brilliant blue R250 staining solution (Bio-Rad). Densitometric quantification was performed with ImageJ.

## **mRNA extraction and real-time qPCR**

Total RNA was extracted with Trizol (Roche Diagnostic GmbH, Germany) and retrotranscribed as previously described.<sup>16</sup> cDNAs were quantified by quantitative real-time PCR on a MX3000 apparatus (Stratagene, La Jolla, CA, USA) by using specific primers. Primer sequences are provided in Supplementary table 1. PCR amplification was performed in a volume of 20  $\mu$ l containing 5 ng cDNA, 300 nM of each primer, GoTaq qPCR Master Mix (Promega, Madison, WI, USA). Gene expression changes were normalised to 36B4 or Ppia gene expression by using the  $\Delta\Delta$ CT method.



## RNA-sequencing

At least 1000 ng total RNA was purified from P30 sciatic nerves from WT, *Xbp1*<sup>SC-KO</sup>, *S63del* and *S63del/Xbp1*<sup>SC-KO</sup> mice using the Zymo RNA Clean & Concentrator-5 (#R1013) and sent to Genewiz (South Plainfield, NJ) for library preparation after PolyA selection and Illumina sequencing (Illumina HiSeq 2x150bp). Illumina sequencing data were mapped to the GRCm38/mm10 genome using the STAR aligner.<sup>35</sup> Data were analyzed using DESeq2 to determine differentially regulated genes (p-value < 0,5).<sup>36</sup> RNA-seq data are deposited in NCBI GEO under accession number GSE252089.

## Statistical analysis

Sample size was not predetermined with any statistical method, but our sample size is similar to that generally used in the field. Graphs and data were analyzed using GraphPad Prism Software. Data show the mean ± Standard Error of Mean (SEM). Unpaired, 2 tails, Student's *t* test (for comparison between two groups) or ANOVA (for comparison between three or four groups) with Tukey post-hoc multiple comparison test were used as specified in the figure legends; significance levels (*P* values) were marked on figures as follows: \**P* ≤ 0.05, \*\**P* ≤ 0.01, \*\*\**P* ≤ 0.001, \*\*\*\**P* ≤ 0.0001.

## Results

### ***Xbp1* is dispensable for peripheral myelin formation, maintenance and remyelination after injury**

To evaluate the role of XBP1 in nerve development and CMT1B pathogenesis, we generated mice with specific ablation of *Xbp1* in Schwann cells (*Xbp1*<sup>SC-KO</sup> mice) by crossing *Xbp1* floxed mice<sup>31</sup> with *P0Cre* mice.<sup>30</sup> *Xbp1*<sup>SC-KO</sup> mice were then crossed with *S63del*-CMT1B mice<sup>8</sup> to obtain *S63del/Xbp1*<sup>SC-KO</sup> and the respective P0Cre-negative controls. To test the efficiency and specificity of P0Cre-mediated recombination, we performed PCR reactions on genomic DNA extracted from 1-month-old sciatic nerves and several other tissues (**Supplementary Fig. 1A**).

In sciatic nerves, the recombined *Xbp1* KO (350bp) band was specifically detected in P0Cre-positive samples, but not in P0Cre negative control nerves, as expected. Moreover, in *Xbp1*<sup>SC-KO</sup> mice, the recombination band appeared only in sciatic nerve and not in other tissues. Accordingly, the mRNA levels of *Xbp1*, which were increased in *S63del* nerves due to the ongoing UPR, were largely reduced in nerve extracts from *Xbp1*<sup>SC-KO</sup> and *S63del/Xbp1*<sup>SC-KO</sup> mice (**Fig. 1A**).

Given the essential role of XBP1 for the differentiation and function of several highly secretory cells such as plasma cells,  $\beta$ -cells and adipocytes,<sup>23,24,37</sup> we reasoned that the ablation of *Xbp1* could have detrimental effects on Schwann cells differentiation and myelination. To test this hypothesis, we examined *Xbp1*<sup>SC-KO</sup> sciatic nerve morphology in postnatal day 5 (P5) (**Supplementary Fig. 1C**), P30 (**Fig. 1B**), P180 (**Fig. 2D**) and in 1-year-old animals (**Supplementary Fig. 1D**). At all these time points, *Xbp1*<sup>SC-KO</sup> nerves did not display any gross myelin abnormality. At P30 and P180, myelin thickness was normal as measured by morphometric g-ratio analysis on semithin sections (**Fig. 1C and Fig. 2G**), and the axon size distribution was unchanged as compared to WT controls (data not shown), suggesting that XBP1/XBP1s is not required for myelination.

Recent work showed activation of ER-stress in the distal segment of injured sciatic nerve and suggested that *Xbp1* deficiency in the nervous system decreased axonal regeneration after injury.<sup>38</sup> To assess whether Schwann cell specific XBP1 was required for remyelination after nerve injury, we performed sciatic nerve crush experiments on 2-month-old *Xbp1*<sup>SC-KO</sup> mice and WT controls and looked at the extent of remyelination 20 days after injury (**Supplementary Fig. 2**). Morphological and morphometric analysis performed on semithin sections did not reveal any significant difference in the extent of remyelination, with comparable numbers of remyelinated fibres in *Xbp1*<sup>SC-KO</sup> and WT injured controls. Taken altogether, these data show that *Xbp1* is dispensable for Schwann cell developmental myelination, for myelin maintenance in the adult and for remyelination after injury.

## **Ablation of *Xbp1* worsens pathological defects in *S63del* CMT1B mice**

We next investigated the role of XBP1 in the *S63del* CMT1B model. In *S63del* nerves, the IRE1 $\alpha$ /XBP1 pathway is activated as early as P5 and remains activated throughout adulthood,

as shown by qRT-PCRs for spliced *Xbp1* (*Xbp1s*) (**Supplementary Fig. 1B**). At the morphological level, genetic ablation of *Xbp1* in Schwann appeared to already aggravate the neuropathic phenotype at P5 (**Supplementary Fig. 1C**). By P30, a time point that roughly corresponds to the peak of myelination and ER-stress in *S63del* mice,<sup>16</sup> *S63del/Xbp1<sup>SC-KO</sup>* sciatic nerves appeared severely compromised, as shown by images of semithin sections (**Fig. 1B**). Accordingly, we observed an increase in the mean g-ratio in *S63del/Xbp1<sup>SC-KO</sup>* nerves as compared to *S63del*, that was consistent for all axon sizes (**Fig. 1D**). In addition, we observed a significant increase in frequency of amyelinated axons (axons with diameter >1mm blocked in a 1:1 relationship with a Schwann cell) in *S63del/Xbp1<sup>SC-KO</sup>* nerves (**Fig. 1C**) Electron microscopy (EM) analysis performed on P30 sciatic nerves confirmed equal myelination in *Xbp1<sup>SC-KO</sup>* and WT nerves. Conversely, the EM analysis showed hypomyelination and increase in amyelinated axons in *S63del/Xbp1<sup>SC-KO</sup>* nerves as compared to the *S63del* control, without significant alterations in Schwann cell morphology (**Supplementary Fig. 3A**).

Adult *S63del* mice manifest altered neurophysiology, locomotor impairment and progressive demyelination, similar to the alterations found in patients.<sup>8,39</sup> To test how the genetic ablation of *Xbp1* would affect these features, we performed neurophysiological analysis on mice at 6 months of age. We confirmed the alteration of NCV in *S63del* mice compared with control mice;<sup>8</sup> *S63del/Xbp1<sup>SC-KO</sup>* showed a very severe impairment of NCV as well as F-wave latencies (**Fig. 2A-B**). *S63del/Xbp1<sup>SC-KO</sup>* mice also showed a reduced latency to fall on the rotarod test as compared to *S63del* (**Fig. 2C**).

In line with neurophysiological and behavioural findings, morphological analysis of 6-month and 1-year old nerves confirmed the hypomyelination of *S63del* nerves as compared to WT and an extensive worsening of the phenotype in *S63del/Xbp1<sup>SC-KO</sup>* (**Fig. 2D and Supplementary Fig. 1D**) as corroborated by g-ratio measurements (**Figure 2G-H**). Finally, western blot (WB) analysis for two of the major myelin components, myelin basic protein (MBP) and peripheral myelin protein 22 (PMP22) confirmed the strong reduction of bulk myelin in 6-month-old *S63del/Xbp1<sup>SC-KO</sup>* nerves (**Fig. 2E-F**).

## **Ablation of *Xbp1* worsens the pathology of R98C mice**

To better understand the relevance of our findings for CMT1B pathogenesis, we then asked whether the protective role of XBP1 could be replicated in a second model of CMT1B that shows high levels of UPR activity, the *Mpz-R98C* mouse.<sup>9</sup> First, we evaluated the morphology

of *R98C* and *R98C/Xbp1<sup>SC-KO</sup>* nerves at P30 and found that overall g-ratio was only marginally increased in *R98C/Xbp1<sup>SC-KO</sup>* as compared to *R98C* ( $0.78 \pm 0.01$  vs  $0.80 \pm 0.01$ ,  $P = 0.3$ ), (**Supplementary Fig 3B-C**). However, by 6-months of age neurophysiological analysis showed that NCV and F-wave latency, already largely compromised in *R98C* nerves, were further worsened in *R98C/Xbp1<sup>SC-KO</sup>* mice (**Fig. 3A-B**), that also displayed reduced motor abilities as compared to *R98C* mice, as measured on the accelerating rotarod (**Fig 3C**). Accordingly, morphological and morphometric analysis performed on both semithin and ultrathin EM sections (**Fig. 3D and 3E**) showed a worsening of the dysmyelinating phenotype of *R98C* mice following Schwann cell specific ablation of *Xbp1*, as confirmed by a significant increase in g-ratio (**Fig. 3F**), with small and medium calibre axons (up to  $7\mu\text{m}$ ) more affected (**Fig. 3G**). Altogether these results indicate that the activation of the IRE1 $\alpha$ /XBP1 pathway of the UPR represents a protective event in early and late stages of different models of proteotoxic CMT1B.

## ***Xbp1* ablation limits UPR and ERAD activation, exacerbates the ER-stress response and impairs Schwann cell differentiation in S63del CMT1B nerves**

To gain insight in the molecular mechanisms underlying the adaptive role of XBP1 in Schwann cells under proteotoxic ER-stress, we performed RNA sequencing on mRNA extracted from P30 *S63del* and *S63del/Xbp1<sup>SC-KO</sup>* sciatic nerves, with WT and *Xbp1<sup>SC-KO</sup>* nerves serving as controls. As already observed from nerve morphology and neurophysiology, XBP1 deletion in healthy mice had no major influence on nerve transcriptome with fewer than 150 genes significantly up- or down- regulated in *Xbp1<sup>SC-KO</sup>* nerves as compared to WT. Conversely, in *S63del* nerves 4585 genes (of which 1637 with a fold change  $> 1.5$ ) were found to be significantly, differentially expressed compared to WT. This number increased to a total of 8155 (4640 with fold change  $> 1.5$ ) in the double mutant *S63del/Xbp1<sup>SC-KO</sup>*, indicating that the ablation of *Xbp1* dramatically impacts the pool of genes found to be dysregulated in CMT1B nerves. Accordingly, volcano plots highlighted how the significance and fold change with which up and downregulated genes in *S63del/Xbp1<sup>SC-KO</sup>* differ from WT is largely increased as compared to *S63del*, confirming a vast alteration in the transcriptional landscape (**Fig. 4A-B**).

Gene Ontology (GO) annotation performed on the upregulated genes, identified “response to unfolded protein”, “response to ER stress” and “protein degradation (via the ubiquitin-ERAD pathway)” among the most significant and enriched biological processes in *S63del* nerves (**Fig. 4C**), in line with what was observed in previous microarray studies.<sup>16</sup> Conversely, in *S63del/Xbp1<sup>SC-KO</sup>* nerves GO processes “UPR” and “ERAD” were no longer in the top hits, where instead we found processes related to “regulation of transcription” and “cell cycle” (**Fig. 4D**). Of note, the GO terms related to the ER-stress response were still present amongst the upregulated processes in *S63del/Xbp1<sup>SC-KO</sup>* nerves but were generally less enriched (**Supplementary Fig. 4A**). The genes that belonged to these categories in *S63del/Xbp1<sup>SC-KO</sup>* were mostly known targets of the PERK/ATF4 arm of the UPR (e.g., *Chop/Ddit3*, *Asns*, *Trib3* and *Mthfd2*), and the ATF6 pathway, (*BiP/Hspa5*, *Grp94* and *Sell1*). Intriguingly, most of the PERK/ATF4 targets were increased in *S63del/XBP1<sup>SC-KO</sup>* nerves as compared to *S63del* (for example, compared to WT nerves, *Chop/Ddit3*, *Asns*, and *Mthfd2* where increased 1.9, 2.1, 1.6 fold and 6.9, 7.2 and 12-fold in *S63del* and *S63del/Xbp1<sup>SC-KO</sup>* respectively) whereas the ATF6 targets remained basically unchanged. This suggests that in the absence of XBP1s, stress pathways (in particular downstream of the PERK branch) are hyperactivated but do not appear to be able to compensate for the lack of XBP1s. As mentioned, regulation of transcription and cell cycle were instead the top GO hits in *S63del/Xbp1<sup>SC-KO</sup>* nerves. In this category we identified a series of early transcription factors, such as *Id2*, *Sox2*, *Pou3f1* and *c-Jun*, that can act as negative regulators of myelination.<sup>40-42</sup> These factors have been shown to be increased in many neuropathic models, including *S63del*,<sup>41,43</sup> and appear to be further increased in the absence of *Xbp1*, supporting the morphological finding of exacerbated dysmyelination in *S63del/Xbp1<sup>SC-KO</sup>* nerves.

On the other hand, downregulated genes in *S63del* nerves were mostly associated with “lipid/cholesterol metabolic processes” or “cell adhesion” and these terms remained the most relevant when XBP1s was removed (**Supplementary Fig. 4B**).

The RNAseq analysis thus suggested that XBP1s is mostly involved in transcriptional activation of target genes. Hence, we reasoned that potential XBP1s targets (direct or indirect) should be activated in *S63del* but not in *S63del/Xbp1<sup>SC-KO</sup>* as compared to WT, and as a result they may appear downregulated in *S63del/Xbp1<sup>SC-KO</sup>* vs *S63del*. This approach identified a total of 362 genes whose activation in *S63del* was lost upon *Xbp1* removal (**Figure 4E**). This set of genes was subjected to GO analysis. Unsurprisingly, this showed that most XBP1s targets are related to the “response to unfolded protein and oxidative stress”, and to “protein refolding or

degradation via ERAD” (**Figure 4F**). We therefore refined our analysis performing a GO analysis for “*cellular compartment*” and focused our attention on genes that were annotated with “*endoplasmic reticulum*”. Among them were genes who had previously been described as components of ERAD and proteasomal degradation (*Derl3*, *Erdj4/Dnajb9*, *Erdj6/Dnajc3* and *Uchl1*), and targets of the UPR and/or ER-stress response pathways (*Sdf2l1*, *Hyou1* and *Creld2*). Taken together, these results show that XBP1 is protective in the S63del neuropathy and suggest that its activation likely reduces ER stress through the stimulation of pro-survival events of the UPR, including ER proteostasis.

To validate these findings, we first performed real time qPCR analysis on mRNA extracted from an independent set of P30 sciatic nerves. This analysis confirmed that *Erdj4* and *Erdj6*, two ER co-chaperones known to associate to and promote the degradation of misfolded proteins, were upregulated in *S63del* nerves, but no longer increased in the absence of XBP1s (**Fig. 5A**). Next, we measured the levels of activation of the other UPR pathways, by evaluating the mRNA levels of PERK pathway targets *Chop*, *Gadd34/Ppp1r15a* and *Mthfd2* and of ATF6 targets *BiP*, *Grp94* and *Sell1*; this analysis confirmed an hyperactivation of the PERK pathway in S63del nerves deleted of *Xbp1*, whereas the ATF6 pathway appeared mostly unchanged (**Fig 5B-C**). This is consistent with what was shown by RNAseq. Finally, we looked at the expression levels of the negative regulator of myelination *Id2*, which was confirmed to be increased in *S63del* nerves as compared to WT and was further increased after *Xbp1* ablation (**Fig. 5D**). Overall, these data confirmed that as early as P30, *Xbp1* ablation in S63del nerves exacerbates ER-stress and hampers Schwann cells differentiation.

The hyperactivation of the PERK pathway in *S63del/Xbp1<sup>SC-KO</sup>* was confirmed at P180, as shown by increased expression of PERK target genes (**Fig 5E**). Similarly *BiP*, the main target of the ATF6 pathway and the key regulator of the ER-stress response, was significantly increased (**Fig. 5F**). To further corroborate these findings, we also checked the protein levels of a subset of UPR factors and observed increased protein levels for P-eIF2 $\alpha$  (PERK pathway) (**Fig. 5G-H**), as well as BiP and GRP94 (ATF6 pathway) in *S63del/Xbp1<sup>SC-KO</sup>* nerves relative to *S63del* (**Fig. 5G and I**). Importantly, we detected a comparable increase in ER-stress levels and early Schwann cell transcription factors also in sciatic nerves from *R98C/Xbp1<sup>SC-KO</sup>* mice (data not shown), suggesting a common pathomechanism following XBP1 ablation.

## IRE1 and RIDD activation do not contribute to worsening the CMT1B phenotype after *Xbp1* ablation

The WB analysis performed in P180 nerves also detected increased levels of IRE1 $\alpha$  (**Fig 5G**). Previous works suggested that genetic ablation of *Xbp1* results in hyperactivation of IRE1 $\alpha$  RNase activity.<sup>32,44,45</sup> Accordingly, we found that in *S63del/Xbp1<sup>SC-KO</sup>* the mutant *Xbp1* mRNA (lacking exon2 and so not encoding a functional protein) was spliced at a substantially higher level than in *S63del* nerves (**Supplementary Fig. 5A**). In addition to its role in the splicing of *Xbp1* mRNA, active IRE1 $\alpha$  can promote cell death via activation of the JNK pathway downstream of phosphorylated IRE1 $\alpha$ ,<sup>46</sup> and induce a pathway known as regulated IRE1 $\alpha$  dependent decay (RIDD) that leads to preferential degradation of ER-localized mRNAs by the IRE1 $\alpha$  RNase. This RIDD activity is thought to function by reducing the amount of proteins entering the ER; however, in response to unmitigated ER stress, RIDD can also initiate apoptosis.<sup>21,47,48</sup> As assessed by the phosphorylation of JNK, the JNK pathway was however not activated either by *S63del* stress or by *Xbp1* deficiency (**Fig 5G and J**). On the other hand, we observed a decrease in mRNA levels for the known RIDD target *Blos1* in P30 and P180 *S63del/Xbp1<sup>SC-KO</sup>* nerves compared to *S63del*, indicating that RIDD is hyperactivated in the nerves lacking *Xbp1* (**Supplementary Figure 5B-C**). This further confirms an overall increase in IRE1 $\alpha$  RNase activity.

This hyperactivation of RIDD raised the question of whether the worsening of the phenotype observed in *S63del/Xbp1<sup>SC-KO</sup>* nerves was solely due to loss of XBP1s or if excessive IRE1 $\alpha$  RIDD activity could also contribute. To answer this question, we turned to a simpler *ex-vivo* myelination system, and prepared dorsal root ganglia (DRG) cultures from WT, *Xbp1<sup>SC-KO</sup>*, *S63del* and *S63del/Xbp1<sup>SC-KO</sup>* E13.5 embryos. As observed in previous reports,<sup>16,18</sup> myelination is largely reduced in *S63del* cultures compared to WT (**Supplementary Fig 5D**). Consistent with the *in vivo* data, the genetic ablation of *Xbp1* does not affect myelination in DRG expressing WT P0 but further reduces the capacity of Schwann cells to produce myelin in cultures expressing the P0*S63del* mutant (**Supplementary Fig 5D-F**). To test if this was caused only by the lack of XBP1s or by IRE1 $\alpha$  RIDD hyperactivation, we treated WT and *S63del* DRGs with 4 $\mu$ 8c (**Supplementary Fig 5G**), a specific non-competitive inhibitor of the endoribonuclease activity of IRE1 $\alpha$ .<sup>49</sup> The treatment was effective in almost completely abolishing IRE1 $\alpha$  RNase activity as measured by *Xbp1s* levels (**Supplementary Fig. 5H**). If hyper-induction of IRE1 $\alpha$  (and thus RIDD) was playing a

detrimental role, *S63del* cultures treated with 4 $\mu$ 8c should show improved myelination as compared to *S63del/Xbp1<sup>SC-KO</sup>* DRGs. Strikingly however, treatment of *S63del* DRG explants with 4 $\mu$ 8c reduced myelination at least as much as *Xbp1* deletion (compare **Supplementary Fig. 5F and 5I**) without impairing myelination in WT controls (**Supplementary Fig. 5G**). These results suggest that the ablation of *Xbp1 per se* is the main factor in the severely worsened CMT1B defects.

## Genetic overexpression of XBP1s ameliorates CMT1B neuropathies *in vivo*

Overall, our data indicated an adaptive role for XBP1 in proteotoxic CMT1B. Interestingly, in both *S63del* and *R98C* nerves only a small proportion of the available XBP1 is spliced.<sup>9,10</sup> We thus wondered if further increase in XBP1s levels in neuropathic Schwann cells would attenuate the disease. To test this hypothesis, we crossed *ROSA-XBP1s* mice, in which a loxP flanked transcriptional STOP sequence coupled to the human XBP1s (*hXBP1s*) cDNA was inserted into the ROSA26 locus,<sup>32</sup> with *P0Cre* and then *S63del* mice, to obtain *XBP1<sup>SC-OE</sup>* and *S63del/XBP1<sup>SC-OE</sup>* mice, in which Cre activation resulted in hXBP1s expression only in Schwann cells. Consistently, we observed that the levels of the XBP1s target gene *Erdj4* were increased in *S63del/XBP1<sup>SC-OE</sup>* as compared to *S63del* at P30, confirming a further activation of the pathway (**Fig. 6A**). Morphological and morphometric analysis, performed on P30 sciatic nerve semithin sections, showed that XBP1s overexpression had no impact on normal myelination, with *XBP1<sup>SC-OE</sup>* being undistinguishable from WT nerves. Remarkably however, in the *S63del* model XBP1s overexpression appeared to ameliorate the hypomyelination defects with a clear trend towards reduced g-ratio values (**Fig. 6B-C**). A more detailed EM analysis confirmed improved myelination in *S63del/XBP1<sup>SC-OE</sup>* nerves when compared with *S63del*, with reduced g-ratio in axons with caliber between 2 and 5  $\mu$ m (**Fig. 6D-E**). In addition, neurophysiological parameters were improved in adult *S63del* animals overexpressing XBP1s, with a significant increase in NCV and a strong trend towards reduction in F-wave latencies (**Fig. 6F-G**). Finally, these improvements were accompanied by a trend towards reduced levels of the negative regulator of myelination *Id2* (**Fig. 6H**) and a partial reduction in UPR markers belonging to the PERK pathway, as measured by WB for P-eIF2 $\alpha$  and qRT-PCR for *Chop* and *Mthfd2* (**Fig. 6I-K**), overall suggesting a readjustment in Schwann cell ER proteostasis.



Importantly, comparable results were observed after crossing the more severe *R98C* model with *ROSA-XBP1s* mice. Adult *R98C/XBP1<sup>SC-OE</sup>* mice showed improved myelination, as measured by g-ratio analysis on both semithin and EM sections (**Fig. 7A-D**), with medium caliber axons in particular showing significantly reduced g-ratio values, and significantly increased NCV as compared to *R98C* mice (**Fig. 7E**). These ameliorations were associated to increased levels of P0 protein, pointing at improved myelination (**Fig. 7F-G**), to reduced levels of P-eIF2 $\alpha$  protein (**Fig. 7F and H**), and of the mRNA for *Chop* and *Mthfd2* (**Fig. 7I-H**), again suggesting reduced ER-stress levels. Taken together, these observations indicate that Schwann cell specific overexpression of XBP1s signaling has a therapeutic potential for multiple CMT1B neuropathies with activated UPR.

## **Pharmacological IRE1/XBP1 activation ameliorates myelination in organotypic DRG cultures**

Recently a series of IRE1 $\alpha$ -XBP1 activators (IXA) have been identified.<sup>50</sup> These compounds have been shown to selectively activate IRE1 $\alpha$  RNase activity and increase the amount of *Xbp1s* mRNA and downstream XBP1s target genes without activating the other UPR branches. Unfortunately, the current compounds are unable to pass the blood-brain and blood-nerve-barriers (BBB and BNB, respectively) (not shown). Thus, to test the potential of these compounds to treat CMT1B we turned once more to DRG explants. First, we confirmed that genetic overexpression of XBP1s would improve myelination also in *ex-vivo* organotypic cultures. Indeed, in DRGs from *S63del/XBP1<sup>SC-OE</sup>* mice, we observed an increased extent of myelination when compared to *S63del* (**Supplementary Figure 6A-B**), again with no alterations in WT myelination. Next, we evaluated the pharmacologic activation of the IRE1 $\alpha$ -XBP1 pathway by testing compound IXA4<sup>51</sup> on DRGs cultures from WT and *S63del* embryos (**Fig. 8A**); qRT-PCR analysis confirmed increased expression levels for *Xbp1s* and its target *Erdj4* (**Fig. 8B**). The treatment with the IXA4 compound was well tolerated, as shown by normal myelination in WT DRGs (**Fig. 8A and Supplementary Figure 6C-D**). Remarkably, in *S63del* DRG explants treatment with 1 $\mu$ M IXA4 improved myelination, as demonstrated by significantly increased number of MBP<sup>+</sup> segments (**Fig. 8A and C**), suggesting that pharmacologic activation of *Xbp1* splicing may represent a novel therapeutic avenue for CMT1B neuropathies.

## Discussion

Defective protein folding and the activation of cellular stress pathways such as the UPR is a common mechanism in many myelin disorders, including CMT.<sup>2,15</sup> We and others have previously shown the potential of modulating the PERK/P-eIF2 $\alpha$  pathway for therapeutic intervention in various forms of CMT1,<sup>17,18</sup> but the contribution of the other pathways of the UPR to neuropathy pathogenesis remained largely unexplored. Here we showed that XBP1 (the main effector of the IRE1 $\alpha$  pathway) has a protective role in two different models of CMT1B, and that its genetic and pharmacologic activation represents a potential new therapeutic option for this currently incurable disease.

### **XBP1 is dispensable for Schwann cell development, myelination and remyelination after injury**

Many studies have highlighted the importance of the IRE1 $\alpha$ /XBP1 axis during development. Mice lacking *Xbp1* die around embryonic day 12-13.5 due to severe liver hypoplasia and fatal anemia.<sup>22</sup> The generation of *Xbp1* conditional null mice has revealed the importance for this factor in the development of cell belonging to the immune system,<sup>52</sup> and its crucial role in highly secretory cells such as B cells<sup>23</sup> and Paneth cells<sup>53</sup> as well as in lipogenesis<sup>45</sup>. During myelination Schwann cell need to synthesise large amounts of lipids and proteins that leads to a physiological activation of the UPR pathways.<sup>54</sup> Yet, lack of *Xbp1* did not appear to impact on Schwann cell development and the myelination process. This is similar to what observed after Schwann cell specific ablation of *Perk*,<sup>55</sup> impediment of eIF2 $\alpha$  phosphorylation<sup>43</sup> or ERAD impairment.<sup>56</sup> These results suggest that Schwann cell are able to adapt to small fluctuations in cellular proteostasis, presumably by virtue of their remarkable plasticity<sup>57</sup> and to efficient protein quality control systems.<sup>2</sup>

Recent work showed a specific activation of the IRE1 $\alpha$ /XBP1 axis of the UPR in neuronal cell bodies and in Schwann cells of the distal segment of peripheral nerves after injury, and a decrease in locomotor recovery after nerve damage in mice lacking *Xbp1* in the nervous system.<sup>38</sup> Overexpression of XBP1s, either in a mouse model where XBP1s is under the control

of the prion promoter or through AAV mediated delivery of XBP1s into adult sensory neurons, accelerated axonal regeneration and locomotor recovery after nerve damage.<sup>38</sup> Conversely, our results indicate that Schwann cell specific *Xbp1* depletion does not influence sciatic nerve remyelination after nerve crush, and thus suggest a neuronal cell autonomous role of XBP1 in nerve regeneration after damage.

## **XBP1 is protective in different models of proteotoxic CMT1B**

In stark contrast with its non-essential role in peripheral nerve myelination, maintenance and remyelination, we found that Schwann cell specific XBP1 expression is crucial to protect Schwann cells from extensive dysmyelination in two different models of CMT1B. In both *S63del* and *R98C* mice, ablation of *Xbp1* resulted in worsening of all the neuropathic features, from behaviour to neurophysiology to morphology. This is reminiscent of what observed in *S63del* mice carrying a non-phosphorylatable eIF2 $\alpha$  allele (*S63del/eIF2 $\alpha$ <sup>SC-AA</sup>* mice).<sup>43</sup> Remarkably however, while the worsening of the phenotype in *S63del/eIF2 $\alpha$ <sup>SC-AA</sup>* was mostly transient, so that adult *S63del/eIF2 $\alpha$ <sup>SC-AA</sup>* were almost undistinguishable from *S63del* mice,<sup>43</sup> *S63del/Xbp1<sup>SC-KO</sup>* and *R98C/Xbp1<sup>SC-KO</sup>* remain severely affected into adulthood, suggesting that a proper activation of the IRE1 $\alpha$ /XBP1 pathway is even more crucial than the PERK/eIF2 $\alpha$  pathway in the context of proteotoxic CMT1B.

XBP1s appears to exert its protective function mostly via up-regulation of genes involved in ER proteostasis pathways such as ERAD. This is particularly intriguing since we and others have recently shown that a functional ERAD is required to maintain myelin in adult glial cells,<sup>56,58</sup> and that impairment of ERAD severely worsens myelin defects and neurophysiological parameters in CMT1B.<sup>56</sup> Mutant misfolded P0 proteins are in fact degraded via the ERAD-proteasome pathway,<sup>56,59</sup> and impairment of ERAD via Schwann cell specific ablation of Derlin-2 exacerbated the UPR and the overall phenotype of *S63del* mice.<sup>56</sup> XBP1s appears to be upstream of this mechanism, and accordingly, ablation of *Xbp1* limits the activation of ERAD genes (including members of the Derlin family, such as Derlin-3), most likely resulting in an overwhelming accumulation of misfolded proteins in the ER of mutant Schwann cells. Indeed, in *S63del* nerves lacking *Xbp1* the transcriptional landscape is extensively altered: stress levels, as measured by targets of the PERK and ATF6 pathways are increased, but appear unable to compensate for the absence of XBP1s. This in turn leads the cells towards a maladaptive state, characterized by the activation of genes involved in cell death

after prolonged UPR activation, such as *Trib3*, a target of the ATF4/CHOP axis,<sup>60</sup> and of genes related to inflammatory processes, such as *Cxcl14* (see Fig. 4B). Of note, *Cxcl14* had been previously shown to be upregulated in CMT1A Schwann cells, and to affect Schwann cell differentiation and myelin gene expression.<sup>61</sup> In this respect it is also noticeable that *S63del/Xbp1<sup>SC-KO</sup>* nerves show a significant increase in the expression of early Schwann cell transcription factors, such as Pou3f1/Oct6, Id2, Sox2 and c-Jun. The downregulation of Pou3f1 soon after birth is necessary for Schwann cell development,<sup>62</sup> and its constitutive expression leads to hypomyelination.<sup>63</sup> Similarly, hypomyelination was also a feature of mice overexpressing c-Jun<sup>64</sup> that, like Id2 and Sox2, has been shown to work as a negative regulator of Schwann cell myelination.<sup>40-42</sup> Increased levels of these factors have been previously detected in nerves of several neuropathic models, including *S63del*.<sup>41</sup> Their extensive upregulation in *S63del/Xbp1<sup>SC-KO</sup>* thus suggests that in conditions of unabated ER-stress Schwann cell differentiation is largely impeded. Intriguingly, a large increase of negative regulators of myelination and a block of Schwann cell differentiation was also detected in *S63del/eIF2 $\alpha$ <sup>SC-AA</sup>* mice,<sup>43</sup> where however lack of eIF2 $\alpha$  phosphorylation did not result in hyperactivation of the other UPR pathways, suggesting different mechanisms in the control of Schwann cell proteostasis between the PERK and the IRE1 $\alpha$  axis.

The ablation of *Xbp1* also led to an hyperactivation of IRE1 $\alpha$  RNase activity, which resulted in a supraphysiological splicing of the *Xbp1* mRNA lacking exon 2 and increased RIDD. This feedback loop had been previously observed in other models<sup>32,45</sup> and indicates that XBP1 itself and the XBP1s-inducible genes have a strong suppressive function against IRE1 $\alpha$  hyperactivation.<sup>32,44</sup> This observation raised the question of whether IRE1 $\alpha$  hyperactivity, through the induction of the JNK pathway or increased RIDD could contribute to the worsening of the CMT1B phenotype following *Xbp1* deletion. Our results however argue against this hypothesis; first, we did not detect any activation of the JNK/P-JNK pathway. Second, pharmacologic inhibition of IRE1 $\alpha$  RNase activity, and therefore of both *Xbp1* splicing and RIDD, had a similar effect as the *Xbp1* KO in myelinating *S63del* DRG cultures. These findings strongly suggest that the lack of the XBP1s is the major driver in the system, although only the full KO of IRE1 $\alpha$  in CMT1B mice would unequivocally answer this question.

**Activation of XBP1s may represent a novel therapy for ER-stress related CMT**

The modulation of protein quality control systems represents an appealing therapeutic candidate in CMT1 disorders characterized by the accumulation of misfolded protein.<sup>65</sup> Curcumin, a low affinity SERCA inhibitor, has been shown to improve the trafficking of mutant proteins and reduce UPR markers in models of CMT1E and 1B.<sup>66,67</sup> More recently, the direct modulation of UPR pathways was demonstrated to be effective in the amelioration of both CMT1B and CMT1A mice. Sephin1/IFB-088, a small molecule inhibitor of PPP1R15A/Gadd34, part of the complex that dephosphorylates eIF2 $\alpha$  downstream of PERK, prolonged translational attenuation in stressed Schwann cells, allowing the cell to better dispose of mutant misfolded protein and to reset cellular proteostasis.<sup>17,18</sup> Here we show that genetically potentiating XBP1s signalling specifically in Schwann cells was able to improve the phenotype of the *S63del* (CMT1B phenotype) and of the more severe *R98C* (DSS phenotype) mouse models. In both *S63del* and *R98C* mice we detected significant neurophysiological and morphological improvements. Due to the role of XBP1s in activating ER proteostasis genes, we speculate that this is likely due to improved handling of misfolded proteins within the ER. Although it is not possible to directly show reduction in mutant P0 accumulation in nerves *in vivo*, our data are supported by the reduction in overall stress levels which directly correlated to mutant protein expression.<sup>8,16</sup> Consistently, molecules such as GlucNac, that promote general protein quality control system including autophagy and ERAD, were capable of improving myelination in DRG explants from CMT1B models,<sup>56</sup> and more recently, elegant work has shown that raising cGMP and proteasomal activity ameliorated disease parameters in the *S63del* mouse.<sup>59</sup> Of note, XBP1s overexpression improved *S63del* mice more than *R98C*. We posit two possible explanations for this: first, *S63del* mice present a milder phenotype to start with, which may be less difficult to improve as compared to the severe *R98C* pathology. Secondly, while *S63del* are transgenic mice that retain the two endogenous alleles of mouse *Mpz*, *R98C* are knock-in mice. Improved ERAD of the mutant protein would thus leave only one WT allele to produce the normal protein in *R98C* nerves, as compared to the two in *S63del*.

Importantly, in both *S63del* and *R98C* mice *Xbp1* mRNA is not fully spliced,<sup>9,10</sup> and the remaining unspliced *Xbp1* may represent a therapeutic reserve. Accordingly, we also showed that the selective, pharmacologic activation of IRE1 $\alpha$ /XBP1s largely increases *Xbp1* splicing and its target genes and can improve myelination in organotypic CMT1B DRG cultures. IXA4 has been shown to induce an adaptive remodeling in obese mice,<sup>51</sup> affirming the potential of this strategy *in vivo*. The development of new IXAs capable of entering the

nervous system is thus highly desirable as prospective novel treatment for several forms of demyelinating proteotoxic neuropathies.

## Data availability

The data that support the findings of this study are available from the corresponding author, upon reasonable request.

## Acknowledgements

We thank Prof. Laurie H. Glimcher for the gift of the *Xbp1* floxed mice, and Dr. Cristina E. Barkauskas for the gift of the *ROSA26-hXBPIs* mice.

## Funding

This work was supported by grants from Fondazione Telethon to MD (GGP14147 and GGP19099) and grants from the Charcot-Marie-Tooth Association (CMTA) to MD and JS, Fondazione Veronesi (postdoctoral fellowship to TT), a Fondazione Fronzaroli (postdoctoral fellowship to FAV), and a grant from NIH to JS (R21 NS127432 provided by NINDS), a core grant to the Waisman Center from the Eunice Kennedy Shriver National Institute of Child Health and Human Development (P50 HD105353) and the National Institutes of Health (AG046495 to JWK and RLW).

## Competing interests

JWK and RLW are shareholders and scientific advisory board members for Protego Biopharma who have licensed IRE1/XBP1s activators including IXA4 for therapeutic development.

## Supplementary material

Supplementary material is available online.

## References

1. Taveggia C, Feltri ML. Beyond Wrapping: Canonical and Noncanonical Functions of Schwann Cells. *Annu Rev Neurosci*. 2022;45:561-580.
2. Volpi VG, Touvier T, D'Antonio M. Endoplasmic Reticulum Protein Quality Control Failure in Myelin Disorders. *Front Mol Neurosci*. 2017;9:162.
3. Bosch-Queralt M, Fledrich R, Stassart RM. Schwann cell functions in peripheral nerve development and repair. *Neurobiol Dis*. 2023;176:105952.
4. Giese KP, Martini R, Lemke G, Soriano P, Schachner M. Mouse P0 gene disruption leads to hypomyelination, abnormal expression of recognition molecules, and degeneration of myelin and axons. *Cell*. 1992;71(4):565-576.
5. Scherer SS, Wrabetz L. Molecular mechanisms of inherited demyelinating neuropathies. *Glia*. 2008;56(14):1578-1589.
6. Wrabetz L, Feltri ML, Kleopa KA, Scherer SS. Inherited neuropathies: clinical, genetic and biological features. In: Lazzarini RA, ed. *Myelin Biology and Disorders*. S. Diego: Elsevier Academic Press; 2004:905-051.
7. Callegari I, Gemelli C, Geroldi A, et al. Mutation update for myelin protein zero-related neuropathies and the increasing role of variants causing a late-onset phenotype. *J Neurol*. 2019;266(11):2629-2645.
8. Wrabetz L, D'Antonio M, Pennuto M, et al. Different intracellular pathomechanisms produce diverse Myelin Protein Zero neuropathies in transgenic mice. *J Neurosci*. 2006;26(8):2358-2368.
9. Saporta MA, Shy BR, Patzko A, et al. MpzR98C arrests Schwann cell development in a mouse model of early-onset Charcot-Marie-Tooth disease type 1B. *Brain*. 2012;135(Pt 7):2032-2047.
10. Pennuto M, Tinelli E, Malaguti M, et al. Ablation of the UPR-mediator CHOP restores motor function and reduces demyelination in Charcot-Marie-Tooth 1B mice. *Neuron*. 2008;57(3):393-405.

11. Bai Y, Wu X, Brennan KM, et al. Myelin protein zero mutations and the unfolded protein response in Charcot Marie Tooth disease type 1B. *Ann Clin Transl Neurol*. 2018;5(4):445-455.
12. Ron D, Walter P. Signal integration in the endoplasmic reticulum unfolded protein response. *Nat Rev Mol Cell Biol*. 2007;8(7):519-529.
13. Walter P, Ron D. The unfolded protein response: from stress pathway to homeostatic regulation. *Science*. 2011;334(6059):1081-1086.
14. D'Antonio M, Feltri ML, Wrabetz L. Myelin under stress. *J Neurosci Res*. 2009;87(15):3241-3249.
15. Clayton BLL, Popko B. Endoplasmic reticulum stress and the unfolded protein response in disorders of myelinating glia. *Brain Res*. 2016;1648(Pt B):594-602.
16. D'Antonio M, Musner N, Scapin C, et al. Resetting translational homeostasis restores myelination in Charcot-Marie-Tooth disease type 1B mice. *J Exp Med*. 2013;210(4):821-838.
17. Bai Y, Treins C, Volpi VG, et al. Treatment with IFB-088 Improves Neuropathy in CMT1A and CMT1B Mice. *Mol Neurobiol*. 2022.
18. Das I, Krzyzosiak A, Schneider K, et al. Preventing proteostasis diseases by selective inhibition of a phosphatase regulatory subunit. *Science*. 2015;348(6231):239-242.
19. Acosta-Alvear D, Zhou Y, Blais A, et al. XBP1 controls diverse cell type- and condition-specific transcriptional regulatory networks. *Mol Cell*. 2007;27(1):53-66.
20. Lee AH, Iwakoshi NN, Glimcher LH. XBP-1 regulates a subset of endoplasmic reticulum resident chaperone genes in the unfolded protein response. *Mol Cell Biol*. 2003;23(21):7448-7459.
21. Hollien J, Weissman JS. Decay of endoplasmic reticulum-localized mRNAs during the unfolded protein response. *Science*. 2006;313(5783):104-107.
22. Reimold AM, Etkin A, Clauss I, et al. An essential role in liver development for transcription factor XBP-1. *Genes Dev*. 2000;14(2):152-157.
23. Reimold AM, Iwakoshi NN, Manis J, et al. Plasma cell differentiation requires the transcription factor XBP-1. *Nature*. 2001;412(6844):300-307.
24. Lee AH, Heidtman K, Hotamisligil GS, Glimcher LH. Dual and opposing roles of the unfolded protein response regulated by IRE1alpha and XBP1 in proinsulin processing and insulin secretion. *Proc Natl Acad Sci U S A*. 2011;108(21):8885-8890.
25. Casas-Tinto S, Zhang Y, Sanchez-Garcia J, Gomez-Velazquez M, Rincon-Limas DE, Fernandez-Funez P. The ER stress factor XBP1s prevents amyloid-beta neurotoxicity. *Hum Mol Genet*. 2011;20(11):2144-2160.
26. Hu Y, Park KK, Yang L, et al. Differential effects of unfolded protein response pathways on axon injury-induced death of retinal ganglion cells. *Neuron*. 2012;73(3):445-452.
27. Hetz C, Thielen P, Matus S, et al. XBP-1 deficiency in the nervous system protects against amyotrophic lateral sclerosis by increasing autophagy. *Genes Dev*. 2009;23(19):2294-2306.



28. Vidal RL, Figueroa A, Court FA, et al. Targeting the UPR transcription factor XBP1 protects against Huntington's disease through the regulation of FoxO1 and autophagy. *Hum Mol Genet.* 2012;21(10):2245-2262.
29. Zuleta A, Vidal RL, Armentano D, Parsons G, Hetz C. AAV-mediated delivery of the transcription factor XBP1s into the striatum reduces mutant Huntingtin aggregation in a mouse model of Huntington's disease. *Biochem Biophys Res Commun.* 2012;420(3):558-563.
30. Feltri ML, D'Antonio M, Previtali S, Fasolini M, Messing A, Wrabetz L. P0-Cre transgenic mice for inactivation of adhesion molecules in Schwann cells. *Ann N Y Acad Sci.* 1999;883:116-123.
31. Hetz C, Lee AH, Gonzalez-Romero D, et al. Unfolded protein response transcription factor XBP-1 does not influence prion replication or pathogenesis. *Proc Natl Acad Sci U S A.* 2008;105(2):757-762.
32. Fedeles SV, So JS, Shrikhande A, et al. Sec63 and Xbp1 regulate IRE1alpha activity and polycystic disease severity. *J Clin Invest.* 2015;125(5):1955-1967.
33. Rivellini C, Dina G, Porrello E, et al. Urokinase plasminogen receptor and the fibrinolytic complex play a role in nerve repair after nerve crush in mice, and in human neuropathies. *PLoS One.* 2012;7(2):e32059.
34. Ferri C, Quattrini A, D'Antonio M. Electron Microscopy for the Analysis of Peripheral Nerve Myelin. *Methods Mol Biol.* 2018;1791:3-13.
35. Dobin A, Davis CA, Schlesinger F, et al. STAR: ultrafast universal RNA-seq aligner. *Bioinformatics.* 2013;29(1):15-21.
36. Anders S, McCarthy DJ, Chen Y, et al. Count-based differential expression analysis of RNA sequencing data using R and Bioconductor. *Nat Protoc.* 2013;8(9):1765-1786.
37. Sha H, He Y, Chen H, et al. The IRE1alpha-XBP1 pathway of the unfolded protein response is required for adipogenesis. *Cell Metab.* 2009;9(6):556-564.
38. Onate M, Catenaccio A, Martinez G, et al. Activation of the unfolded protein response promotes axonal regeneration after peripheral nerve injury. *Sci Rep.* 2016;6:21709.
39. Miller LJ, Patzko A, Lewis RA, Shy ME. Phenotypic presentation of the Ser63Del MPZ mutation. *J Peripher Nerv Syst.* 2012;17(2):197-200.
40. Parkinson DB, Bhaskaran A, Arthur-Farraj P, et al. c-Jun is a negative regulator of myelination. *J Cell Biol.* 2008;181(4):625-637.
41. Florio F, Ferri C, Scapin C, Feltri ML, Wrabetz L, D'Antonio M. Sustained Expression of Negative Regulators of Myelination Protects Schwann Cells from Dysmyelination in a Charcot-Marie-Tooth 1B Mouse Model. *J Neurosci.* 2018;38(18):4275-4287.
42. Roberts SL, Dun XP, Doddrell RDS, et al. Sox2 expression in Schwann cells inhibits myelination in vivo and induces influx of macrophages to the nerve. *Development.* 2017;144(17):3114-3125.
43. Scapin C, Ferri C, Pettinato E, et al. Phosphorylation of eIF2alpha Promotes Schwann Cell Differentiation and Myelination in CMT1B Mice with Activated UPR. *J Neurosci.* 2020;40(42):8174-8187.

44. Gebert M, Sobolewska A, Bartoszewska S, et al. Genome-wide mRNA profiling identifies X-box-binding protein 1 (XBP1) as an IRE1 and PUMA repressor. *Cell Mol Life Sci.* 2021;78(21-22):7061-7080.
45. Lee AH, Scapa EF, Cohen DE, Glimcher LH. Regulation of hepatic lipogenesis by the transcription factor XBP1. *Science.* 2008;320(5882):1492-1496.
46. Urano F, Wang X, Bertolotti A, et al. Coupling of stress in the ER to activation of JNK protein kinases by transmembrane protein kinase IRE1. *Science.* 2000;287(5453):664-666.
47. Chang TK, Lawrence DA, Lu M, et al. Coordination between Two Branches of the Unfolded Protein Response Determines Apoptotic Cell Fate. *Mol Cell.* 2018;71(4):629-636 e625.
48. Han D, Lerner AG, Vande Walle L, et al. IRE1alpha kinase activation modes control alternate endoribonuclease outputs to determine divergent cell fates. *Cell.* 2009;138(3):562-575.
49. Cross BC, Bond PJ, Sadowski PG, et al. The molecular basis for selective inhibition of unconventional mRNA splicing by an IRE1-binding small molecule. *Proc Natl Acad Sci U S A.* 2012;109(15):E869-878.
50. Grandjean JMD, Madhavan A, Cech L, et al. Pharmacologic IRE1/XBP1s activation confers targeted ER proteostasis reprogramming. *Nat Chem Biol.* 2020;16(10):1052-1061.
51. Madhavan A, Kok BP, Rius B, et al. Pharmacologic IRE1/XBP1s activation promotes systemic adaptive remodeling in obesity. *Nat Commun.* 2022;13(1):608.
52. Hetz C, Martinon F, Rodriguez D, Glimcher LH. The unfolded protein response: integrating stress signals through the stress sensor IRE1alpha. *Physiol Rev.* 2011;91(4):1219-1243.
53. Kaser A, Lee AH, Franke A, et al. XBP1 links ER stress to intestinal inflammation and confers genetic risk for human inflammatory bowel disease. *Cell.* 2008;134(5):743-756.
54. Musner N, Sidoli M, Zambroni D, et al. Perk Ablation Ameliorates Myelination in S63del-Charcot-Marie-Tooth 1B Neuropathy. *ASN Neuro.* 2016;8(2).
55. Sidoli M, Musner N, Silvestri N, et al. Ablation of Perk in Schwann Cells Improves Myelination in the S63del Charcot-Marie-Tooth 1B Mouse. *J Neurosci.* 2016;36(44):11350-11361.
56. Volpi VG, Ferri C, Fregno I, et al. Schwann cells ER-associated degradation contributes to myelin maintenance in adult nerves and limits demyelination in CMT1B mice. *PLoS Genet.* 2019;15(4):e1008069.
57. Kim HA, Mindos T, Parkinson DB. Plastic fantastic: Schwann cells and repair of the peripheral nervous system. *Stem Cells Transl Med.* 2013;2(8):553-557.
58. Wu S, Lin W. Endoplasmic reticulum associated degradation is essential for maintaining the viability or function of mature myelinating cells in adults. *Glia.* 2023;71(5):1360-1376.
59. VerPlank JJS, Gawron J, Silvestri NJ, Feltri ML, Wrabetz L, Goldberg AL. Raising cGMP restores proteasome function and myelination in mice with a proteotoxic neuropathy. *Brain.* 2022;145(1):168-178.

60. Ohoka N, Yoshii S, Hattori T, Onozaki K, Hayashi H. TRB3, a novel ER stress-inducible gene, is induced via ATF4-CHOP pathway and is involved in cell death. *EMBO J.* 2005;24(6):1243-1255.
61. Barbaria EM, Kohl B, Buhren BA, et al. The alpha-chemokine CXCL14 is up-regulated in the sciatic nerve of a mouse model of Charcot-Marie-Tooth disease type 1A and alters myelin gene expression in cultured Schwann cells. *Neurobiol Dis.* 2009;33(3):448-458.
62. Jaegle M, Mandemakers W, Broos L, et al. The POU factor Oct-6 and Schwann cell differentiation. *Science.* 1996;273(5274):507-510.
63. Ryu EJ, Wang JY, Le N, et al. Misexpression of Pou3f1 results in peripheral nerve hypomyelination and axonal loss. *J Neurosci.* 2007;27(43):11552-11559.
64. Fazal SV, Gomez-Sanchez JA, Wagstaff LJ, et al. Graded Elevation of c-Jun in Schwann Cells In Vivo: Gene Dosage Determines Effects on Development, Remyelination, Tumorigenesis, and Hypomyelination. *J Neurosci.* 2017;37(50):12297-12313.
65. Bolino A, D'Antonio M. Recent advances in the treatment of Charcot-Marie-Tooth neuropathies. *J Peripher Nerv Syst.* 2023;28(2):134-149.
66. Okamoto Y, Pehlivan D, Wiszniewski W, et al. Curcumin facilitates a transitory cellular stress response in Trembler-J mice. *Hum Mol Genet.* 2013;22(23):4698-4705.
67. Patzko A, Bai Y, Saporta MA, et al. Curcumin derivatives promote Schwann cell differentiation and improve neuropathy in R98C CMT1B mice. *Brain.* 2012;135(Pt 12):3551-3566.

## Figure legends

**Figure 1 Schwann cell specific ablation of *Xbp1* worsens pathology in developing *S63del* mice.** (A) qRT-PCR analysis for *Xbp1* exon 2 (which is deleted following CRE mediated recombination) on mRNA extracts from P30 sciatic nerves;  $n = 5-7$  reverse transcription (RT) per genotype from independent nerves. (B) Transverse semithin sections from P30 sciatic nerves. Scale bar 10 $\mu$ m. (C) G-ratio analysis performed on P30 sciatic nerves semithin sections;  $n = 3-4$  mice per genotype (D) Average g-ratio plotted by axon diameter. (E)

Percentage of amyelinated axons (axons > 1 $\mu$ m in a 1:1 relationship with a Schwann cell but not myelinated); 8-10 microscopy field from semithin sections per mouse were evaluated from  $n = 3$  mice per genotype. Error bars represent SEM and \*\*\*\* $P < 0.0001$ , \*\*\*  $P < 0.001$ , \*\*  $P < 0.01$ , \*  $P < 0.05$  by one-way ANOVA followed by Tukey post hoc test.

**Figure 2 Schwann cell specific ablation of *Xbp1* worsens neurophysiological, behavioral and morphological parameters in adult *S63del* mice.** Analysis of nerve conduction velocities (NCV) (A) and F-wave latencies (B) in 6-months old mice; *S63del/Xbp1<sup>SC-KO</sup>* mice show severe neurophysiological worsening as compared to *S63del*;  $n = 12-16$  mice per genotype. \*\*\*\* $P < 0.0001$  and \*\*  $P < 0.01$  by one-way ANOVA followed by Tukey post hoc test. (C) Rotarod analysis performed at 6 months show reduced motor capacity in *S63del/Xbp1<sup>SC-KO</sup>* mice. \*\*  $P < 0.01$  by unpaired Student's *t*-test. (D) Transverse semithin sections from 6-months old sciatic nerves. Scale bar 10 $\mu$ m. (E) Western blot analysis on sciatic nerve extracts and (F) relative quantification for the myelin proteins MBP and PMP22;  $\beta$ -tubulin was used as loading control. \*\*  $P < 0.01$  by one-way ANOVA followed by Tukey post hoc test;  $n = 4$ . (G) G-ratio analysis performed on 6-month-old sciatic nerve semithin sections and (H) average g-ratio plotted by axon diameter from  $n = 3$  mice per genotype. Error bars represent SEM and \*\*\*\* $P < 0.0001$ , \*\*\*  $P < 0.001$ , \*\*  $P < 0.01$ , \*  $P < 0.05$  by one-way ANOVA followed by Tukey post hoc test.

**Figure 3 Schwann cell specific ablation of XBP1 worsens neurophysiological, behavioral and morphological parameters in adult *R98C* mice.** Analysis of nerve conduction velocities (NCV) (A) and F-wave latencies (B) in 6-months old mice.  $n = 6-12$  mice per genotype. \*\*\*\* $P < 0.0001$  by one-way ANOVA followed by Tukey post hoc test. (C) Rotarod analysis performed at 6-months show reduced motor capacity in *R98C/Xbp1<sup>SC-KO</sup>* mice. \*  $P < 0.05$  by unpaired Student's *t*-test. (D) Transverse semithin sections from 6-months old sciatic nerves. Scale bar 10 $\mu$ m. (E) Electron microscopy on sciatic nerve transverse sections from *R98C* and *R98C/Xbp1<sup>SC-KO</sup>* mice at 6-months show severely reduced myelin thickness in CMT1B mice lacking *Xbp1*; Scale bar 5 $\mu$ m. (F) G-ratio analysis performed on 6-month-old sciatic nerve semithin sections and (G) average g-ratio plotted by axon diameter from  $n = 3$  mice per

genotype. Error bars represent SEM and \*\*\*\* $P < 0.0001$ , \*\*  $P < 0.01$ , \*  $P < 0.05$  by unpaired Student's *t*-test.

**Figure 4 RNA-sequencing in *S63del* and *S63del/Xbp1<sup>SC-KO</sup>*** (A) Volcano plot showing the genes differentially regulated in P30 *S63del* nerves in comparison to WT. (B) Volcano plot showing the genes differentially regulated in P30 *S63del/Xbp1<sup>SC-KO</sup>* nerves in comparison to WT. (C) Gene ontology (GO) of biological processes upregulated in *S63del* vs WT. (D) GO of biological processes upregulated in *S63del/Xbp1<sup>SC-KO</sup>* vs WT. (E) Venn-diagram of genes upregulated in *S63del* nerves as compared to WT, and genes down-regulated in *S63del/Xbp1<sup>SC-KO</sup>* as compared to *S63del*. The 362 common genes are likely direct or indirect targets of XBP1. (F) GO of the 362 putative targets of XBP1s.

**Figure 5 Ablation of *Xbp1* limits ER-associated degradation, exacerbates ER-stress and impairs Schwann cell differentiation in *S63del* mice.** qRT-PCR analysis on mRNAs extracted from P30 sciatic nerves for (A) the XBP1s targets *Erdj4* and *Erdj6* (B) the PERK/ATF4 pathway targets *Chop*, *Gadd34* and *Mthfd2* and (C) the ATF6 pathway targets *BiP*, *Grp94* and *Sell1*. (D) qRT-PCR analysis for the negative regulator of myelination *Id2*. (E-F) qRT-PCR analysis on mRNAs extracted from P180 sciatic nerves for the (E) PERK/ATF4 targets *Chop*, *Gadd34* and *Mthfd2* and (F) the ATF6 pathway targets *BiP*, *Grp94* and *Sell1*. For all qRT-PCR experiments  $n = 8-10$  RTs from independent nerves for each genotype. Values are expressed as fold change relative to WT (arbitrarily set to 100); error bars represent SEM. (G) Representative Western blots from P180 sciatic nerve extracts for IRE1a, GRP94, P-JNK, BiP and P-eIF2a; b-tubulin was used as loading control. One representative blot of four (quantified in the graphs in H, I and J) is shown per each genotype. Values are expressed as arbitrary units relative to WT that was set to 1. Bars represent SEM. For all panels \*\*\*\* $P < 0.0001$ , \*\*\*  $P < 0.001$ , \*\*  $P < 0.01$ , \*  $P < 0.05$  by one-way ANOVA followed by Tukey post hoc test.

**Figure 6 Schwann cell specific overexpression of spliced XBP1 ameliorates disease parameters in *S63del* mice.** (A) qRT-PCR analysis on mRNAs extracted from P30 (upper graph) and P180 (lower graph) sciatic nerves for the XBP1s targets *Erdj4* and *Erdj6*.  $n = 6-8$  RTs from independent nerves for each genotype. Values are expressed as fold change relative

to WT (arbitrarily set to 100); error bars represent SEM. \*\*\*\* $P < 0.0001$ , \*  $P < 0.05$  by one-way ANOVA followed by Tukey post hoc test. (B) Transverse semithin sections from P30 sciatic nerves. Scale bar 10 $\mu$ m. (C) G-ratio analysis performed on the P30 semithin sections. \*\*  $P < 0.01$  by one-way ANOVA (D) EM transverse section (scale bar 5 $\mu$ m) from P30 sciatic nerves and (E) relative g-ratio values plotted by axon diameter. Error bars represent SEM; \*\*  $P < 0.01$ , \*  $P < 0.05$  by unpaired Student's *t*-test.  $n = 80$ -100 fibers per nerve were measured from 5 mice per genotype. (F) NCV and (G) F-wave latency measurements on 6-month-old mice;  $n = 4$ -8 mice per genotype. \*\*\*\* $P < 0.0001$ , \*\*  $P < 0.01$ , by one-way ANOVA followed by Tukey post hoc test. (H) qRT-PCR analysis on mRNAs extracted from P180 sciatic nerves for the negative regulator of myelination *Id2*.  $n = 8$ -10 RTs from independent nerves for each genotype. Values are expressed as fold change relative to WT (arbitrarily set to 100); error bars represent SEM, \*\*\*  $P < 0.001$  by one-way ANOVA followed by Tukey post hoc test. (I) Western blot analysis on P180 sciatic nerve extracts for P-eIF2 $\alpha$ . Two representative samples out of four per genotype are shown; (J) quantification of P-eIF2 $\alpha$  levels as arbitrary units (a.u.) relative to WT. (K) qRT-PCR analysis on mRNAs extracted from P180 sciatic nerves for *Chop* and *Mthfd2*.  $n = 5$  RTs from independent nerves for each genotype. Values are expressed as fold change relative to WT (arbitrarily set to 100); error bars represent SEM, \*\*\*\* $P < 0.0001$ , \*\*\*  $P < 0.001$ , \*  $P < 0.05$  by one-way ANOVA followed by Tukey post hoc test.

**Figure 7 Schwann cell specific overexpression of spliced XBP1 ameliorates disease parameters in *R98C* mice.** (A) Transverse semithin sections and (B) relative g-ratio analysis from adult (P160) sciatic nerves. (C) EM transverse sections (scale bar 5 $\mu$ m) and (D) g-ratio analysis from adult *R98C* and *R98C/XBP1<sup>SC-OE</sup>* sciatic nerves.  $n = 150$  fibers per nerve were measured. \*\*\*\* $P < 0.0001$ , \*\*  $P < 0.01$  by unpaired Student's *t*-test. (E) Nerve conduction velocity studies.  $n = 4$ -12 mice per genotype. \*\*\*\* $P < 0.0001$ , \*\*\*  $P < 0.001$  by one-way ANOVA followed by Tukey post hoc test. (F) Western blot analysis on sciatic nerve extracts for P0 and P-eIF2 $\alpha$ ;  $\beta$ -tubulin was used as loading control. Two representative samples out of four are shown for each genotype. (G) protein levels quantification for P0 and (H) P-eIF2 $\alpha$  expressed as arbitrary units. Error bars represent SEM and \*\*  $P < 0.01$ , \*  $P < 0.05$  by one-way ANOVA followed by Tukey post hoc test. (I) qRT-PCR analysis for *Chop* and (J) *Mthfd2* on mRNA extracts from P180 nerves.  $n = 8$ -12 RTs from independent nerves for each genotype. Values are expressed as fold change relative to WT (arbitrarily set to 100); error bars represent SEM, \*  $P < 0.05$  by one-way ANOVA followed by Tukey post hoc test.

**Figure 8 Pharmacologic activation of IRE1 $\alpha$  mediated *Xbp1* splicing improves myelination in *S63del* dorsal root ganglia cultures.** (A) Dorsal root ganglia were dissected from E13.5 WT and *S63del* embryos and myelination induced with 50 $\mu$ m ascorbic acid in the presence or absence of 1 $\mu$ m IXA4. Myelinating internodes were visualized with an antibody against myelin protein zero (MBP) (B) qRT-PCRs from mRNA extracted from WT or *S63del* cultures treated with vehicle or 1 $\mu$ m IXA4 for *Xbp1s* and its target *Erdj4*.  $n = 3-4$  RT from independent experiments. Error bars represent SEM and \*\*\*\* $P < 0.0001$ , \*\*  $P < 0.01$ , \*  $P < 0.05$  by one-way ANOVA followed by Tukey post hoc test. (C) Quantification of MBP+ internodes in *S63del* cultures after IXA4 treatment. \*  $P < 0.05$  by Student  $t$ -test.

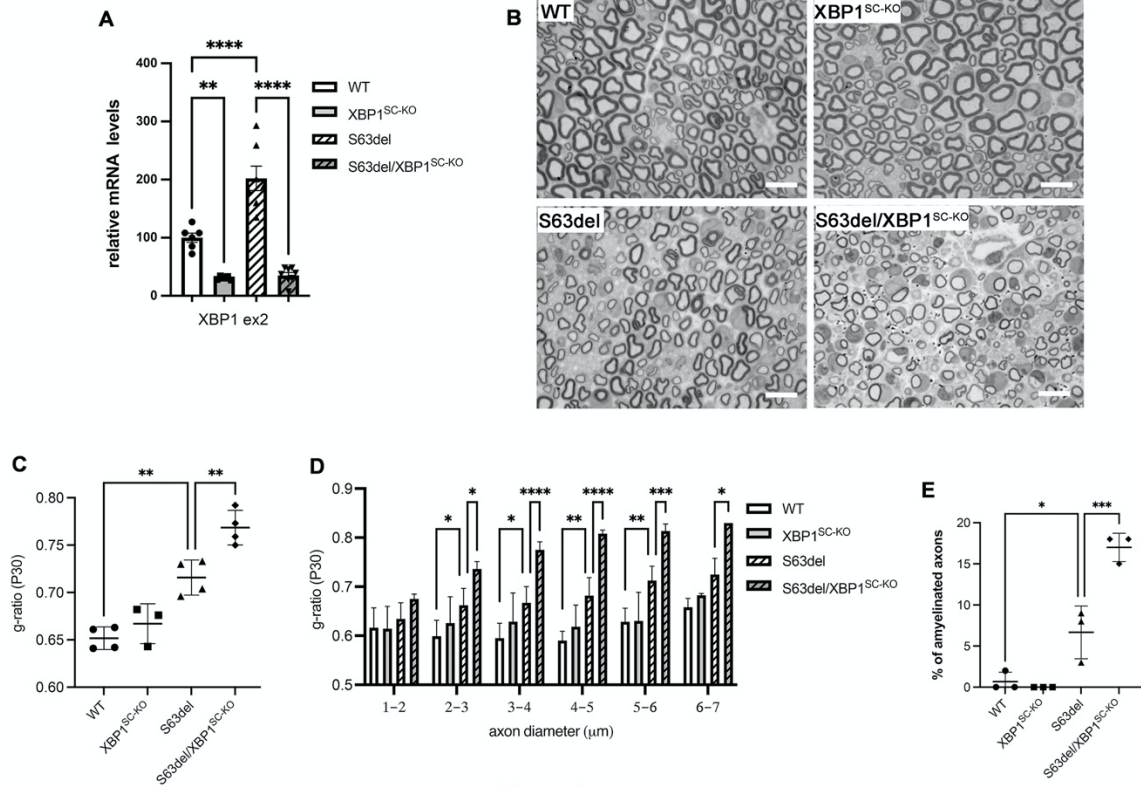

**Figure 1**



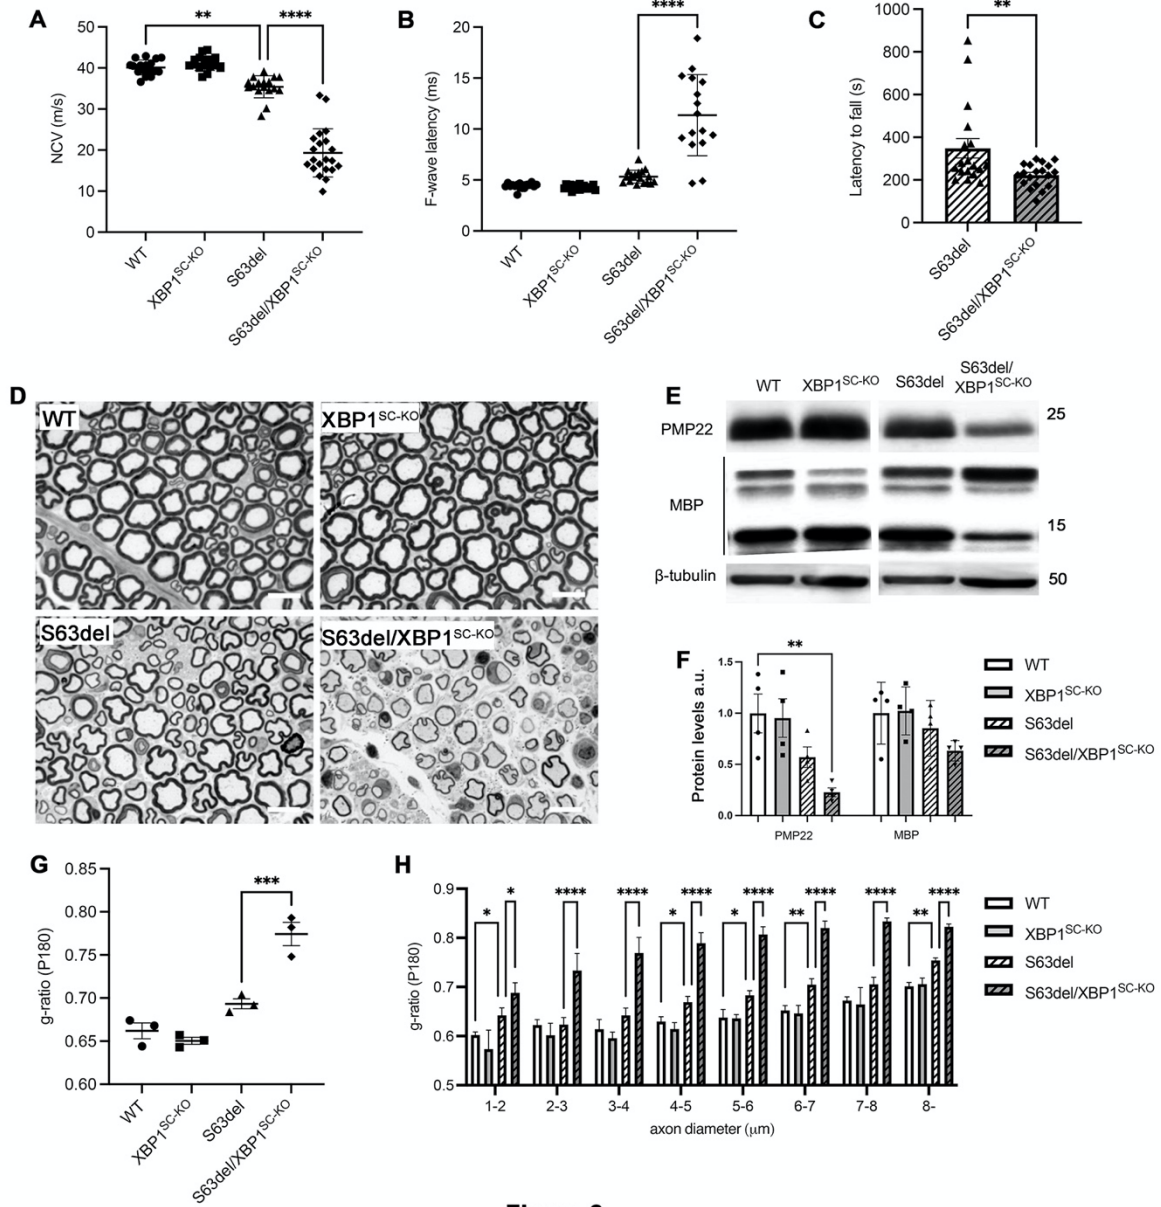

**Figure 2**

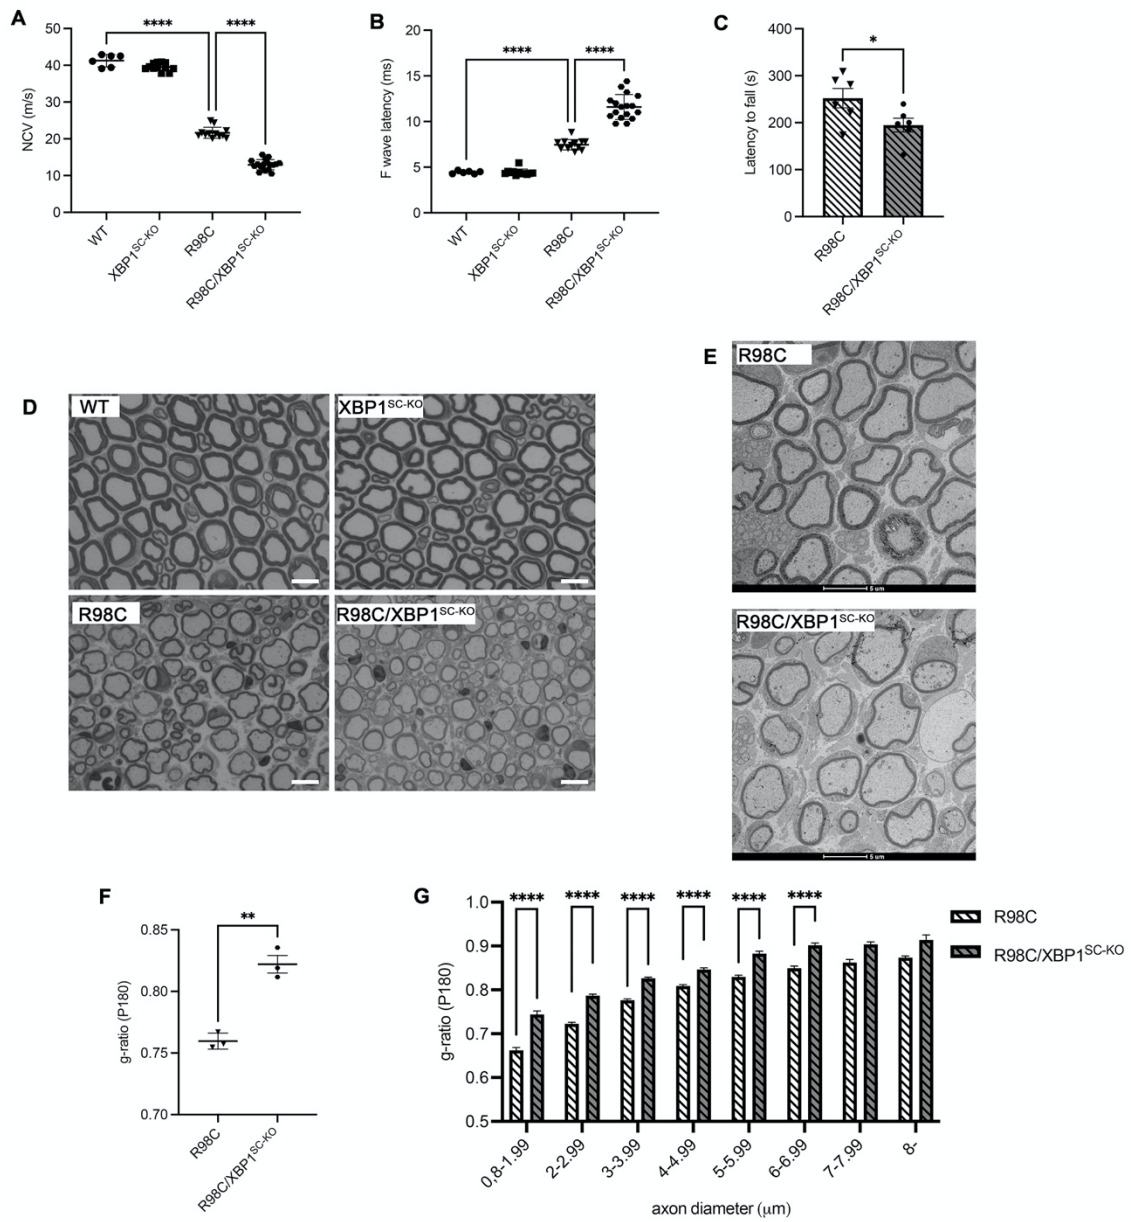

**Figure 3**

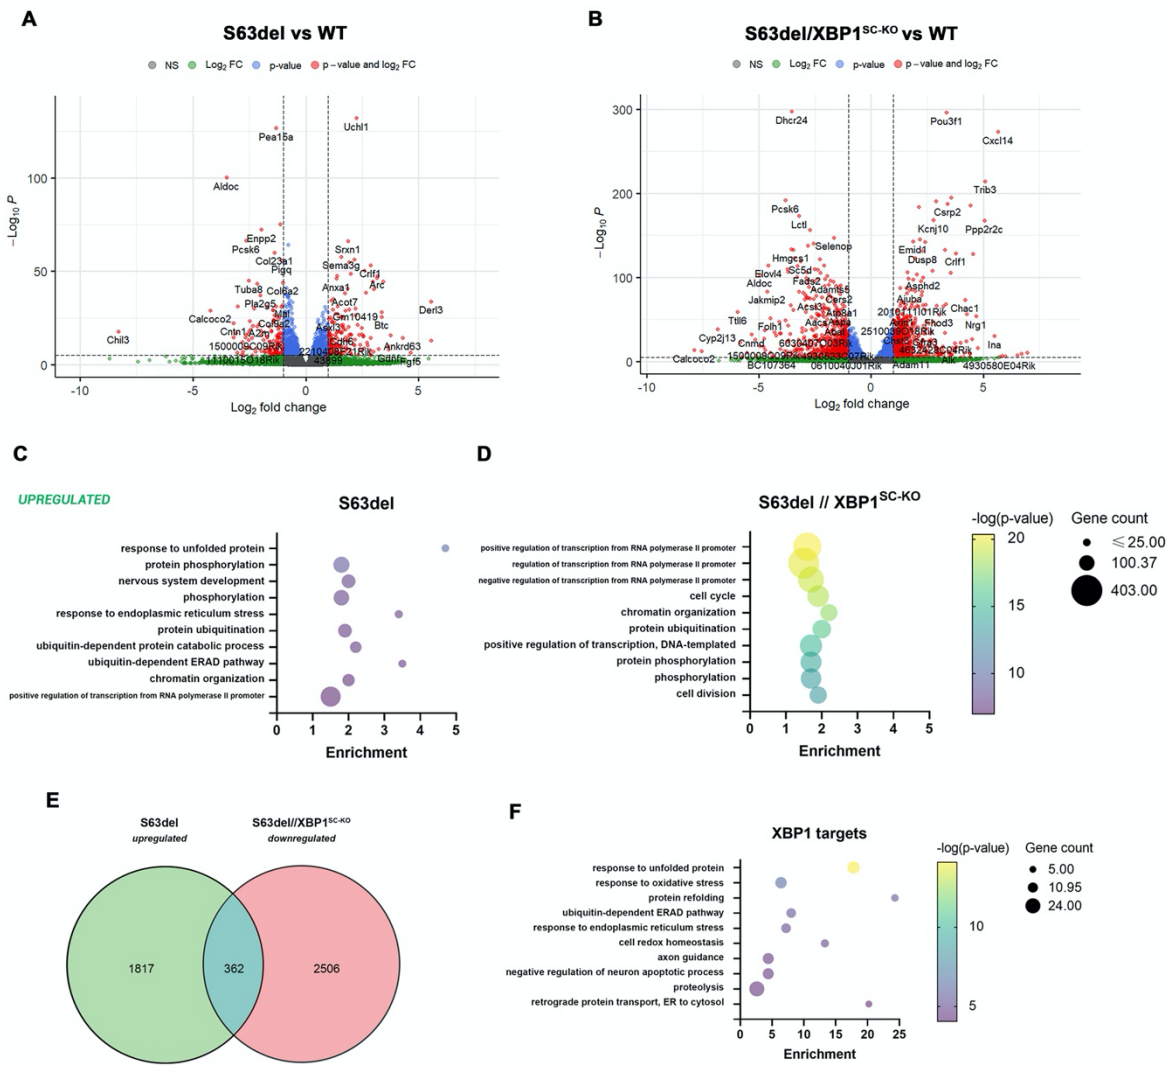

**Figure 4**

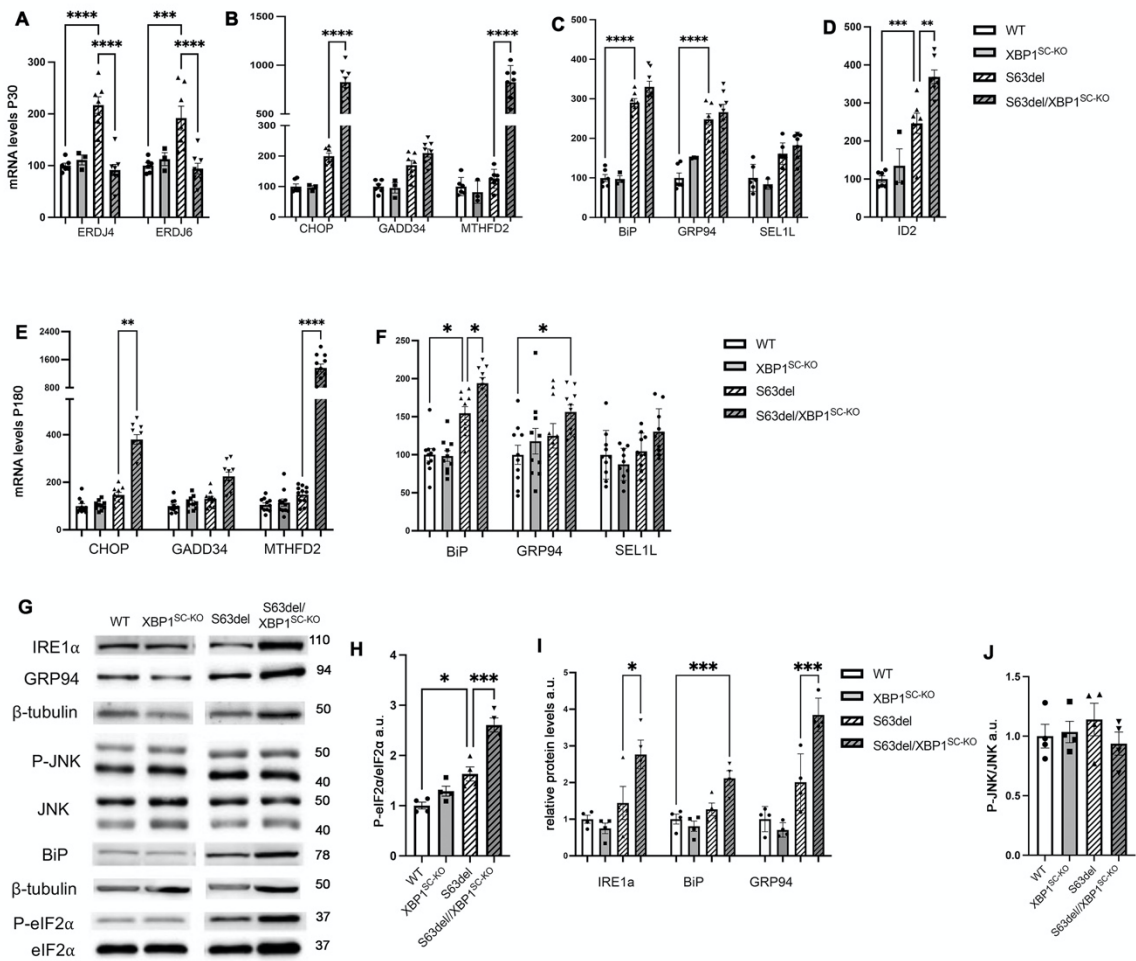

Figure 5

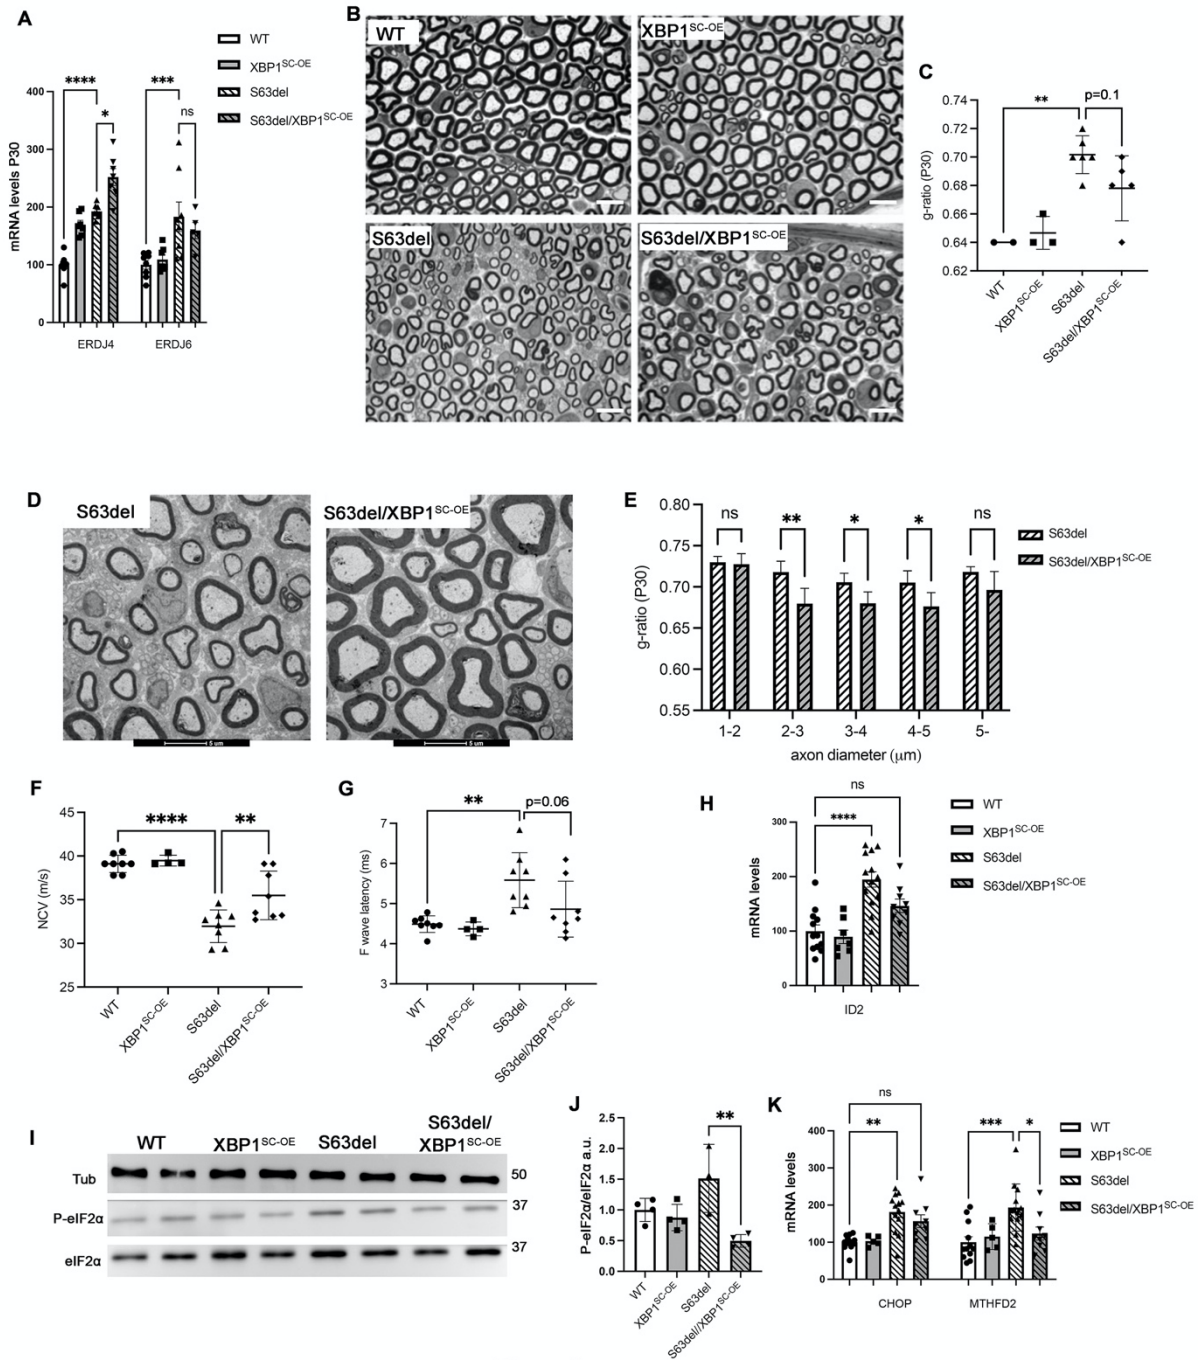

Figure 6

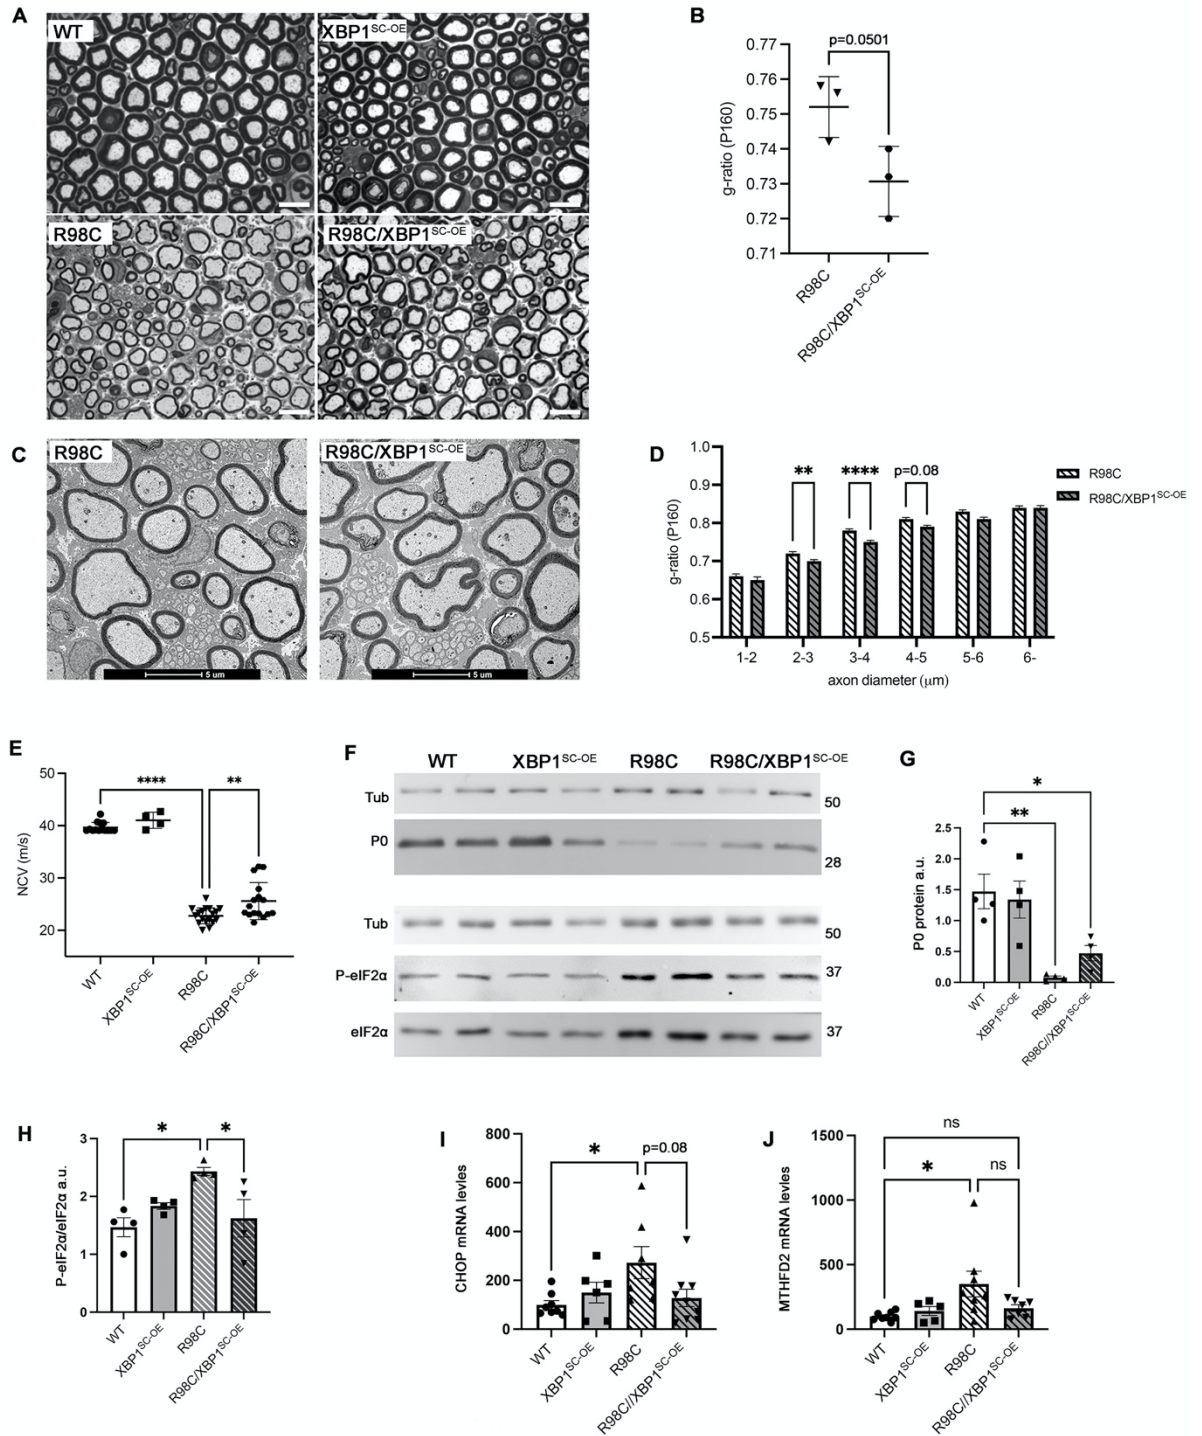

**Figure 7**

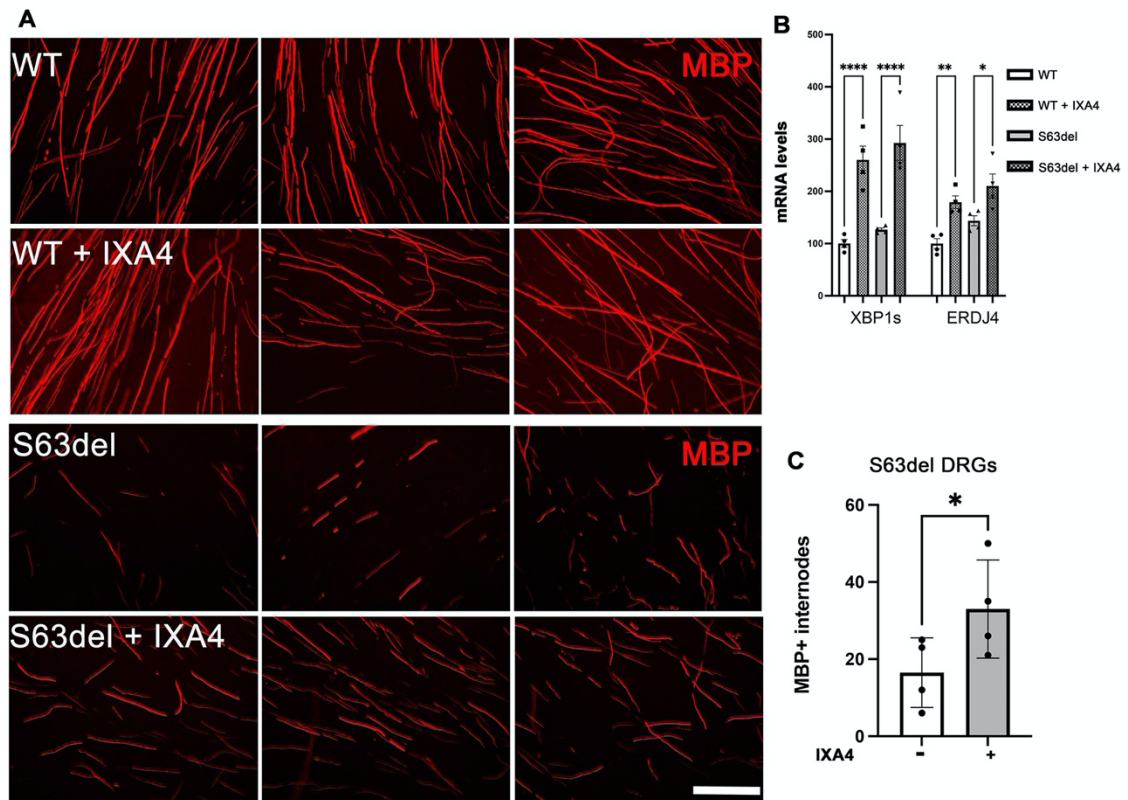

Figure 8
